# Supplementary material for: Self-rated health and type 2 diabetes risk in the European Prospective Investigation into Cancer and Nutrition-InterAct study: a case-cohort study
Source: PubMed Central journal article supplement — BMJ Open. 2013 Mar 6;3(3):e002436. doi: 10.1136/bmjopen-2012-002436 (PMC3612773; doi:10.1136/bmjopen-2012-002436), 2013-03-06
Supplement: bmjopen-2012-002436.draft_revisions.pdf [file bmjopen-2012-002436.draft_revisions.pdf]

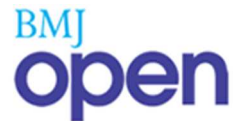

**Self-rated Health and Type 2 Diabetes Risk in the EPIC-InterAct Study: a case-cohort study**

|                                 |                                                                                                                                                                                                                                                                                                                                                                                                                                                                                                                                                                                                                                                                                                                                                                                                                                                                                                                                                                                                                                                                                                                                                                                                                                                                                                                                    |
|---------------------------------|------------------------------------------------------------------------------------------------------------------------------------------------------------------------------------------------------------------------------------------------------------------------------------------------------------------------------------------------------------------------------------------------------------------------------------------------------------------------------------------------------------------------------------------------------------------------------------------------------------------------------------------------------------------------------------------------------------------------------------------------------------------------------------------------------------------------------------------------------------------------------------------------------------------------------------------------------------------------------------------------------------------------------------------------------------------------------------------------------------------------------------------------------------------------------------------------------------------------------------------------------------------------------------------------------------------------------------|
| Journal:                        | <i>BMJ Open</i>                                                                                                                                                                                                                                                                                                                                                                                                                                                                                                                                                                                                                                                                                                                                                                                                                                                                                                                                                                                                                                                                                                                                                                                                                                                                                                                    |
| Manuscript ID:                  | bmjopen-2012-002436                                                                                                                                                                                                                                                                                                                                                                                                                                                                                                                                                                                                                                                                                                                                                                                                                                                                                                                                                                                                                                                                                                                                                                                                                                                                                                                |
| Article Type:                   | Research                                                                                                                                                                                                                                                                                                                                                                                                                                                                                                                                                                                                                                                                                                                                                                                                                                                                                                                                                                                                                                                                                                                                                                                                                                                                                                                           |
| Date Submitted by the Author:   | 03-Dec-2012                                                                                                                                                                                                                                                                                                                                                                                                                                                                                                                                                                                                                                                                                                                                                                                                                                                                                                                                                                                                                                                                                                                                                                                                                                                                                                                        |
| Complete List of Authors:       | Wennberg, Patrik; Umeå University, Public Health and Clinical Medicine, Family Medicine<br>Rolandsson, Olov; Umeå University, Public Health and Clinical Medicine, Family Medicine<br>van der A, Daphne; National Institute for Public Health and the Environment, Centre for Prevention and Health Services Research<br>Spijkerman, Annemieke; National Institute for Public Health and the Environment, Centre for Prevention and Health Services Research<br>Kaaks, Rudolf; German Cancer Research, CenterDivision of Cancer Epidemiology<br>Boeing, Heiner; German Institute of Human Nutrition Potsdam-Rehbrücke, Department of Epidemiology<br>Feller, Silke; German Institute of Human Nutrition Potsdam-Rehbrücke, Department of Epidemiology<br>Bergmann, Manuela; German Institute of Human Nutrition Potsdam-Rehbrücke, Department of Epidemiology<br>Langenberg, Claudia; Institute of Metabolic Science, Addenbrooke's Hospital,, MRC Epidemiology Unit<br>Sharp, Stephen; University of Cambridge, ; Institute of Metabolic Science, Addenbrooke's Hospital,, MRC Epidemiology Unit<br>Forouhi, Nita; MRC Epidemiology Unit,<br>Riboli, Elio; Imperial College London, Department of Epidemiology & Biostatistics, School of Public Health<br>Wareham, Nicholas; University of Cambridge, Institute of Public Health |
| <b>Primary Subject Heading</b>: | Diabetes and endocrinology                                                                                                                                                                                                                                                                                                                                                                                                                                                                                                                                                                                                                                                                                                                                                                                                                                                                                                                                                                                                                                                                                                                                                                                                                                                                                                         |
| Secondary Subject Heading:      | Public health                                                                                                                                                                                                                                                                                                                                                                                                                                                                                                                                                                                                                                                                                                                                                                                                                                                                                                                                                                                                                                                                                                                                                                                                                                                                                                                      |
| Keywords:                       | DIABETES & ENDOCRINOLOGY, General diabetes < DIABETES & ENDOCRINOLOGY, PREVENTIVE MEDICINE                                                                                                                                                                                                                                                                                                                                                                                                                                                                                                                                                                                                                                                                                                                                                                                                                                                                                                                                                                                                                                                                                                                                                                                                                                         |
|                                 |                                                                                                                                                                                                                                                                                                                                                                                                                                                                                                                                                                                                                                                                                                                                                                                                                                                                                                                                                                                                                                                                                                                                                                                                                                                                                                                                    |

1  
2  
3 **Self-rated Health and Type 2 Diabetes Risk in the EPIC-InterAct Study: a**  
4 **case-cohort study**  
5  
6  
7

8 P. Wennberg 1; O. Rolandsson 1; D.L. van der A 2; A.W. Spijkerman 2; R. Kaaks 3; H.  
9 Boeing 4; S. Feller 4; M.M. Bergmann 4; C. Langenberg 5; S.J. Sharp 5; N. Forouhi 5; E.  
10 Riboli 6; N. Wareham 5  
11

12  
13 1. Department of Public Health and Clinical Medicine, Umeå University, Umeå, Sweden;  
14 2. National Institute for Public Health and the Environment, Centre for Prevention and  
15 Health Services Research, Bilthoven, The Netherlands; 3. Division of Cancer  
16 Epidemiology, German Cancer Research Center, Heidelberg, Germany; 4. Department of  
17 Epidemiology, German Institute of Human Nutrition Potsdam-Rehbrücke, Nuthetal,  
18 Germany; 5. MRC Epidemiology Unit, Institute of Metabolic Science, Addenbrooke's  
19 Hospital, Cambridge, United Kingdom; 6. Department of Epidemiology & Biostatistics,  
20 School of Public Health, Imperial College London, London, United Kingdom.  
21  
22  
23  
24  
25  
26  
27  
28  
29  
30  
31

32 Correspondence: P. Wennberg  
33

34 Address: Portstigen 24, 931 51 Skellefteå, Sweden  
35  
36

37 Fax: +46 90 776883, Telephone: +46 90 7851423  
38  
39

40 E-mail: patrik.wennberg@famned.umu.se  
41  
42

43 Key words: Type 2 diabetes, self-rated health, prevention, case-cohort  
44

45 Word count (main text): 3426  
46  
47

48 Word count (abstract): 247  
49  
50  
51  
52  
53  
54  
55  
56  
57  
58  
59  
60

1  
2  
3 The Corresponding Author has the right to grant on behalf of all authors and does grant  
4 on behalf of all authors, an exclusive licence (or non-exclusive for government  
5 employees) on a worldwide basis to the BMJ Publishing Group Ltd and its Licensees to  
6 permit this article (if accepted) to be published in BMJ Open and any other BMJPG  
7 products to exploit all subsidiary rights, as set out in our licence (  
8 [http://group.bmj.com/products/journals/instructions-for-](http://group.bmj.com/products/journals/instructions-for-authors/wholly_owned_licence.pdf)  
9 [authors/wholly\\_owned\\_licence.pdf](http://group.bmj.com/products/journals/instructions-for-authors/wholly_owned_licence.pdf).) and the Corresponding Author accepts and  
10 understands that any supply made under these terms is made by BMJPG to the  
11 Corresponding Author.  
12  
13  
14  
15  
16  
17  
18  
19  
20  
21  
22  
23  
24  
25  
26  
27  
28  
29  
30  
31  
32  
33  
34  
35  
36  
37  
38  
39  
40  
41  
42  
43  
44  
45  
46  
47  
48  
49  
50  
51  
52  
53  
54  
55  
56  
57  
58  
59  
60

**Abstract**

**Objectives** To investigate the association between self-rated health and risk of type 2 diabetes.

**Design** Population-based prospective case-cohort study.

**Setting** Enrolment took place between 1992 and 2000 in five European centres (Bilthoven, Cambridge, Heidelberg, Potsdam, Umeå).

**Participants** Self-rated health was assessed by baseline questionnaire in 3,399 incident type 2 diabetic case participants and a centre-stratified subcohort of 4,619 individuals from the EPIC-InterAct study which was drawn from a total cohort of 340,234 participants in the European Prospective Investigation into Cancer and Nutrition (EPIC).

**Primary outcome measure** Prentice-weighted Cox regression was used to estimate centre-specific hazard ratios (HRs) and 95% confidence intervals (CIs) for incident type 2 diabetes controlling for age, sex, centre, education, BMI, smoking, alcohol consumption, energy intake, physical activity, and hypertension. The centre-specific HRs were pooled across centres by random effects meta-analysis.

**Results** Low self-rated health was associated with a higher hazard of type 2 diabetes after adjusting for age and sex (pooled HR 1.67, 95% CI 1.48 to 1.88). After additional adjustment for health-related variables including BMI, the association was attenuated but remained statistically significant (pooled HR 1.29, 95% CI 1.09 to 1.53).  $I^2$  index for heterogeneity across centres was 13.3% ( $p=0.33$ ).

**Conclusions** Low self-rated health was associated with a higher risk of type 2 diabetes. The association could be only partly explained by other health-related variables, of which obesity was the strongest. We found no indication of heterogeneity in the association between self-rated health and type 2 diabetes mellitus across the European centres.

## Article Summary

### Article focus

- Self-rated health has been widely used as a global health measure. Several cross-sectional studies have suggested an association between low self-rated health and type 2 diabetes mellitus.
- We aimed to prospectively investigate the association between self-rated health and risk of type 2 diabetes. A population-based case-cohort study design was used and five European centers were included in the study.

### Key messages

- Results from this study provide some evidence that low self-rated health is associated with a higher risk of type 2 diabetes mellitus. The association could be only partly explained by other health-related variables, of which obesity was the strongest.
- We found no indication of heterogeneity in the association between self-rated health and type 2 diabetes mellitus across centres.

### Strength and limitations

- The study used a thorough ascertainment and verification of type 2 diabetes mellitus cases and included populations from four different European countries.
- The assessment of self-rated health differed somewhat between centres regarding time frames for the self-rated health question.

## Introduction

The prevalence of type 2 diabetes mellitus (T2DM) worldwide has more than doubled since 1980.<sup>1</sup> In 2010, it was estimated that over 250 million people suffered from T2DM.<sup>2</sup> Several risk factors have been identified (e.g. age, BMI, family history and physical inactivity) but the aetiology of T2DM is complex and still largely unknown. Self-rated health (SRH) is a subjective measure of health usually defined by responses to a single question such as "How do you rate your health?". SRH is suggested to capture physical, psychological and social aspects that may be difficult to assess by objective health measurements<sup>3</sup>. Furthermore, SRH has been associated with bodily sensations and symptoms that can reflect disease in clinical or pre-clinical stages.<sup>4-5</sup> Individuals with poor self-rated health (SRH) tend to have higher mortality,<sup>3 6</sup> poorer physical activity<sup>7</sup> and higher health care utilization<sup>8</sup> than individuals rating their health as excellent or good. Several cross-sectional studies in different populations have reported associations between poor SRH and prevalent diabetes<sup>9-11</sup> or glucometabolic disturbance.<sup>12</sup> To our knowledge, only one previous prospective study on the association between SRH and incidence of T2DM has been published, showing that reduced SRH is associated with newly diagnosed T2DM after a five year follow-up.<sup>13</sup> However, this prospective study was limited by high loss to follow-up. The EPIC-InterAct Study is a large case-cohort study that provides an ideal setting to investigate the association between SRH and T2DM across several European countries.

## Methods

### *Study population*

The InterAct Project was initiated to investigate how genetic and lifestyle behavioural factors, particularly diet and physical activity, interact on the risk of developing diabetes and how knowledge about such interactions may be translated into preventive action. The EPIC-InterAct case-cohort study was nested in the European Prospective

1  
2  
3 Investigation into Cancer and Nutrition (EPIC), which in total consists of 519,978 men  
4 and women across Europe.<sup>14</sup> Out of these, 340,234 participants were eligible for the  
5 EPIC-InterAct study, which includes centres from eight different European countries  
6 (Denmark, France, Germany, Italy, the Netherlands, Spain, Sweden and the United  
7 Kingdom). A detailed description of the study design and methods can be found  
8 elsewhere.<sup>15</sup> In the present analysis we only included centres that had baseline data  
9 available on self-rated health (Germany: Heidelberg and Potsdam; the U.K.: Cambridge;  
10 the Netherlands: Bilthoven; Sweden: Umeå). Participants were 25 to 70 years old at  
11 enrolment between 1992 and 2000. Among the participants from the five centres  
12 included in this study, 3,412 incident T2DM cases were identified and a subcohort of  
13 4,637 individuals were randomly selected after exclusions for prevalent diabetes or  
14 unknown diabetes status. Data on self-rated health was available for 4,619 individuals in  
15 the subcohort and 3,399 incident T2DM cases. Due to the random nature of the case-  
16 cohort design applied in the present study, the subcohort also included 140 individuals  
17 who developed T2DM during follow-up. All participants gave written consent and the  
18 study was approved by the ethical review board of the International Agency for Research  
19 on Cancer and by the local review boards of the participating centres.

#### 20 21 22 *Ascertainment of T2DM cases*

23 Incident cases of T2DM until 31 December 2007 were ascertained and verified at each  
24 EPIC centre participating in the Epic-Interact project using follow-up questionnaires  
25 (T2DM diagnosed by a medical doctor or anti-diabetic drug use), linkage to primary and  
26 secondary care registers, medication use (prescription registers), hospital admission and  
27 mortality data. Cases in Sweden were not ascertained by self-report, but identified via  
28 local and national diabetes and pharmaceutical registers and hence all ascertained cases  
29 were considered to be verified.<sup>15</sup> To increase the specificity of the case definition and to  
30 avoid inclusion in the study based on self-report of T2DM alone, further evidence was  
31 sought for all incident cases of T2DM. T2DM cases were included in the study only if  
32  
33  
34  
35  
36  
37  
38  
39  
40  
41  
42  
43  
44  
45  
46  
47  
48  
49  
50  
51  
52  
53  
54  
55  
56  
57  
58  
59  
60

1  
2  
3 confirmation of the diagnosis was secured from no less than two independent sources,  
4 including individual medical-record review.  
5  
6  
7

#### 8 9 *Assessment of self-rated health*

10 SRH was assessed at baseline using self-administered questionnaires in the native  
11 language. The questionnaires were somewhat differently formulated at each centre and  
12 were therefore standardized (described in **Appendix**). Given the low frequency of  
13 responses in the extreme categories (n=305 in the lowest category) we dichotomized the  
14 SRH variable in the analysis by combining the two highest categories (high SRH) and the  
15 two lowest categories (low SRH) in conformity with previous research.<sup>16-18</sup>  
16  
17  
18  
19  
20  
21  
22

#### 23 24 *Assessment of covariates*

25 Weight and height were measured with participants not wearing shoes. Each participant's  
26 body weight was corrected for clothing worn during measurement in order to reduce  
27 heterogeneity due to protocol differences among centres.<sup>19</sup> Body mass index (BMI) was  
28 calculated, as weight (kilograms) divided by height (metres) squared. Hypertension was  
29 defined as self-reported medical history of hypertension or hypertension (based on  
30 measurements or drug use) at baseline. Further health-related variables were collected  
31 using questionnaires including questions on educational level, smoking status (current  
32 smoker versus non-smoker or ex-smoker), diet, physical activity level, alcohol  
33 consumption, and previous myocardial infarction. Physical activity (PA) was assessed  
34 using the Cambridge index, a validated ordered categorical global index of activity  
35 derived from simple questions assessing recreational and occupational activity.<sup>20</sup>  
36  
37  
38  
39  
40  
41  
42  
43  
44  
45  
46  
47

#### 48 49 *Statistical analysis*

50 The association between SRH and various baseline characteristics within the subcohort  
51 was tested using a chi-square test (for categorical variables) and a Kruskal-Wallis test  
52 (for continuous variables). Cox proportional hazards regression, modified for the case-  
53 cohort design according to the Prentice method,<sup>21</sup> was used to estimate centre-specific  
54  
55  
56  
57  
58  
59  
60



1  
2  
3 hazard ratios (HRs) and 95% confidence intervals (CI) for the association between SRH  
4 and T2DM. Age was used as the primary time variable, with entry time defined as the  
5 participant's age in years at recruitment and exit time as the participant's age in years at  
6 date of diagnosis, death or censoring. The centre-specific HRs were then pooled across  
7 centres by random effects meta-analysis.  
8  
9  
10

11  
12  
13 It is not clear whether SRH mechanistically operates as an indicator of some unmeasured  
14 process or as a summary of a large number of other measures.<sup>3 22</sup> Therefore, a large set  
15 of covariates were considered as potential confounders and included in models to  
16 determine pooled HRs at different levels of adjustment. All models were adjusted for age  
17 and sex. Each model was then further adjusted for the other health-related variables,  
18 one at a time and finally, all potential confounders in the same model. Education level,  
19 smoking status, physical activity and hypertension were included as categorical variables,  
20 whereas BMI, alcohol consumption and energy intake were included as continuous  
21 variables.  $I^2$  – the percentage of variation between centres due to heterogeneity – was  
22 calculated. A possible interaction between SRH and sex on T2DM incidence was tested by  
23 introducing an interaction term in the regression analysis. We conducted a sensitivity  
24 analysis by excluding participants who were diagnosed with T2DM within two years of  
25 follow-up. In a second sensitivity analysis we excluded all participants with history of  
26 myocardial infarction at baseline. To investigate the impact of missing data, a third  
27 sensitivity analysis was conducted by multiple imputation of missing data considered  
28 missing at random (based on 5, 10 and 50 imputations) in cases and non-cases. For each  
29 variable with missing data, a predictive model was created among participants with no  
30 missing data; that model was then used to predict values for participants who were  
31 missing those data.<sup>23</sup> All analyses were performed using Stata 11.2, except for the  
32 random effects meta-analysis which was performed using Comprehensive Meta-Analysis  
33 version 2.  
34  
35  
36  
37  
38  
39  
40  
41  
42  
43  
44  
45  
46  
47  
48  
49  
50  
51  
52  
53  
54  
55  
56  
57

## 58 **Results**

1  
2  
3 The mean follow-up time was 9.1 years ( $\pm$  3.8). SRH by centre in incident cases of  
4 T2DM and subcohort individuals is presented in **Table 1**. **Table 2** shows the baseline  
5 characteristics of individuals in the subcohort by categories of SRH. Participants with low  
6 SRH were younger, had lower educational level and a higher BMI than participants with  
7 high SRH. Moreover, participants with low SRH were more often smokers, less physically  
8 active, had lower alcohol consumption and estimated reported energy intake, and more  
9 frequently had hypertension and a history of myocardial infarction than persons with  
10 high SRH.  
11  
12  
13  
14  
15  
16  
17  
18  
19

20 In a model with adjustment for age and centre, low SRH was associated with a higher  
21 hazard of T2DM (HR 1.67, 95% CI 1.48 to 1.88) (**Table 3**). We found no significant  
22 interaction between SRH and sex on T2DM incidence ( $p=0.54$ ) and the analyses were  
23 therefore not stratified by sex. The strength of the association between SRH and T2DM  
24 was mainly unaffected by adjustment for smoking, alcohol consumption and estimated  
25 reported energy intake. Adjustment for other health-related variables, BMI in particular,  
26 led to attenuation of the association (adding BMI to the model attenuated the pooled HR  
27 to 1.38, 95% CI 1.19 to 1.60). In a final model with adjustment for age, sex, education,  
28 BMI, smoking, physical activity, alcohol consumption, estimated reported energy intake  
29 and hypertension, the association was attenuated but remained significant (HR 1.29,  
30 95% CI 1.09 to 1.53). The centre-specific HRs and the pooled HR based on the final  
31 model are presented in **Figure 1**. We found no indication of heterogeneity in the  
32 association between SRH and T2DM across centres ( $I^2$  index 13.3%,  $p=0.33$ ).  
33  
34  
35  
36  
37  
38  
39  
40  
41  
42  
43  
44  
45

46 In a first sensitivity analysis we excluded participants who were diagnosed with T2DM  
47 within two years of follow-up ( $n=398$ ). These exclusions had only minor effect on the  
48 pooled HR (1.29, 95% CI 1.08 to 1.55, adjusted for the variables in the final model). The  
49 number of participants with history of myocardial infarction was low ( $n=202$ ) and the  
50 multivariate model did not fit when this covariate was included. Thus, in the second  
51 sensitivity analysis we excluded all participants with a history of myocardial infarction at  
52  
53  
54  
55  
56  
57  
58  
59  
60

1  
2  
3 baseline. This did not change the conclusions (pooled HR 1.27, 95% CI 1.08 to 1.50,  
4 adjusted for the variables in the final model). Because of missing data on covariates, 323  
5 T2DM cases and 405 members of the subcohort were excluded from analyses. As a third  
6 sensitivity analysis, multiple imputations of these data, assuming missingness at random,  
7 were conducted. No significant differences in results were found in datasets based on 5,  
8 10 or 50 imputations, compared to the original dataset. Therefore, it seems unlikely that  
9 the results are biased due to missing data.  
10  
11  
12  
13  
14  
15  
16  
17  
18

### 19 **Discussion**

20 In this prospective case-cohort study we found that low SRH was associated with a  
21 higher risk of T2DM. The association was partly explained by other health-related  
22 variables, particularly BMI. We found no indication of heterogeneity in the association  
23 between SRH and T2DM across the European centres.  
24  
25  
26  
27  
28

29 SRH has been widely used as a global health measure. Previous studies on general  
30 populations have shown that there is a strong relationship between SRH and mortality,  
31 even after controlling for sociodemographic factors, objective measures of health status,  
32 and health behaviours<sup>6 24</sup>. A few studies have investigated the association between SRH  
33 and mortality in populations of diabetes patients with results similar to those of general  
34 populations<sup>17 25-26</sup>. SRH and prevalent diabetes have been associated in several cross-  
35 sectional studies<sup>9-12 27</sup>. However, cross-sectional studies are limited by their inability to  
36 study the temporal sequence of exposure and disease. Furthermore, these studies have  
37 not separated type 2 and type 1 diabetes.  
38  
39  
40  
41  
42  
43  
44  
45  
46

47 Any causality cannot be established by an observational study, but the findings in this  
48 prospective study imply that there is a dominant direction of this association from low  
49 SRH to T2DM (i.e. a temporal relationship). We have only found one previous  
50 prospective study of the association between SRH and T2DM in a large general  
51 population. In the Australian Diabetes Obesity and Lifestyle study, Tapp et al.<sup>13</sup> found  
52 that participants with newly diagnosed diabetes had reported impaired general health  
53  
54  
55  
56  
57  
58  
59  
60

1  
2  
3 before the onset of T2DM. The study was limited by a shorter follow-up (5 years) and  
4 they did not present any sensitivity analysis with exclusion of participants, who were  
5 diagnosed with T2DM shortly after baseline, which makes a bidirectional association  
6 more likely. Furthermore, the study was limited by a low follow-up response rate.  
7  
8  
9

10  
11 In the present study, low SRH was associated with a higher BMI which is in line with  
12 previous research. In a study investigating the relationship between self-rated health  
13 and obesity, Prosper et al. found that obese individuals had a 3-fold greater odds of  
14 reporting reduced health compared to individuals with normal weight or overweight. As  
15 obesity is also considered to be a major risk factor for diabetes <sup>28</sup>, obesity is likely to  
16 explain a substantial part of the association between low SRH and T2DM. Thus, it is not  
17 surprising that BMI may act as an important confounder in the association between SRH  
18 and T2DM in this study -or as a mediator since SRH and obesity might be on the same  
19 causal pathway.  
20  
21  
22  
23  
24  
25  
26  
27  
28  
29

30 Previous research on occupational cohorts has suggested that SRH principally reflects  
31 physical and mental health problems and to a lesser extent age, early life factors, family  
32 history, sociodemographic variables, psychosocial factors, and health behaviours <sup>22</sup>. One  
33 study that used in-depth interviews found that the same frame of reference is not used  
34 by all respondents in answering this question <sup>29</sup>. Some study participants think about  
35 specific health problems when asked to rate their health, whereas others think in terms  
36 of either general physical functioning or health behaviours. In our study, the question for  
37 SRH referred to different time frames (e.g. perception of health *today* in Germany and  
38 perception of health over the *last year* in Sweden). SRH has shown to be stable over  
39 time in population-based studies, suggesting that a considerable component of SRH  
40 reflects an aspect of one's enduring self-concept and to a lesser extent a spontaneous  
41 assessment of one's health status <sup>30</sup>. Thus, the impact of different time frames on SRH  
42 assessment is likely to be small.  
43  
44  
45  
46  
47  
48  
49  
50  
51  
52  
53  
54

55  
56 Compared to studies of SRH with mortality outcomes in individuals with diabetes <sup>17 25-26</sup>  
57 the strength of the SRH association (with T2DM incidence) found in the present study  
58  
59  
60

1  
2  
3 was weak. There may be several explanations for this. It has been shown that diabetes  
4 patients have higher mortality rates from several causes <sup>31</sup>, including cancer <sup>32</sup>. It is  
5 likely that the comparatively strong association between SRH and mortality is due to a  
6 higher ability for SRH to summarize global health risk among diabetes patients than  
7 specifically metabolic risk in a general population. It is also possible that SRH is more  
8 susceptible to “reporting behaviour” (i.e. how optimistic or pessimistic people are about  
9 their health) <sup>33</sup> in a generally healthier population compared to subjective health ratings  
10 later on in the disease process.  
11  
12

13  
14  
15  
16  
17  
18  
19 Previous findings suggest that there may be sex differences in the SRH-mortality  
20 association <sup>34</sup> but we found no sex difference in the association between SRH and T2DM.  
21 SRH may also vary across countries <sup>35</sup>. In the present study, it is likely that the  
22 differences in SRH across centres to some extent can be explained by different sampling  
23 strategies and age distributions at different centres. We did not find support for  
24 heterogeneity in the association between SRH and T2DM across centres in this study.  
25 However, the study was restricted to countries in northern Europe. It is therefore not  
26 clear how these findings are generalisable to other populations.  
27  
28  
29  
30  
31  
32  
33  
34  
35

36 Strengths of the present study include the thorough ascertainment and verification of  
37 T2DM cases. Moreover, cultural differences may also have an impact on SRH, even within  
38 Europe and we included populations from four different European countries <sup>36</sup>. Several  
39 limitations of the study have already been listed, such as different time frames for the  
40 SRH question and the restriction to countries in northern Europe. We would also like to  
41 point out that it is possible that participants reporting low SRH at baseline were more  
42 likely to seek medical advice during follow-up and hence were more likely to be tested  
43 for diabetes (detection bias). If this was the case, the study may have overestimated  
44 the risk of T2DM associated with low SRH.  
45  
46  
47  
48  
49  
50  
51  
52

53  
54 In our study, part of the SRH-T2DM association seemed to be explained by medical  
55 history as well as lifestyle variables. SRH may therefore be considered as a summary  
56 health measure – also for metabolic health. If there is access to several of the  
57  
58  
59  
60

1  
2  
3 established risk factors for diabetes, self-rated health is not likely to add more than  
4 marginally to risk prediction on top of the conventional risk factors. However, whether  
5 SRH adds predictive value over and above established risk factors needs to be further  
6 analysed using adequate methods <sup>37</sup>.  
7  
8  
9

10  
11 In conclusion, results from this prospective case-cohort study provide some evidence  
12 that low self-rated health is associated with a higher risk of type 2 diabetes mellitus. The  
13 association could be only partly explained by other health-related variables, of which  
14 obesity was the strongest.  
15  
16  
17  
18  
19  
20  
21  
22  
23  
24

## 25 **Footnotes**

26  
27 *Contributors:* PW had access to all data for this study, analysed the data, drafted the  
28 manuscript and is the guarantor. All authors qualify for authorship according to BMJ Open  
29 criteria. They have all contributed to conception and design, and interpretation of data,  
30 revising the article critically for important intellectual content and final approval of the  
31 version to be published.  
32  
33  
34  
35  
36

37 *Competing interests:* All authors have completed the Unified Competing Interest form at  
38 [www.icmje.org/coi\\_disclosure.pdf](http://www.icmje.org/coi_disclosure.pdf) (available on request from the corresponding author)  
39 and declare: no support from any organisation for the submitted work; no financial  
40 relationships with any organisation that might have an interest in the submitted work in  
41 the previous three years; no other relationships or activities that could appear to have  
42 influenced the submitted work.  
43  
44  
45  
46  
47  
48

49 *Funding:* Funding for the InterAct project was provided by the EU FP6 programme [grant  
50 number Integrated Project LSHM\_CT\_2006\_037197]. The funder had no role in study  
51 design, data collection and analysis, decision to publish, or preparation of the  
52 manuscript. In addition, InterAct investigators acknowledge funding from the following  
53 agencies: DLvdA and AMWS: Dutch Ministry of Public Health, Welfare and Sports (VWS),  
54  
55  
56  
57  
58  
59  
60

1  
2  
3 Netherlands Cancer Registry (NKR), LK Research Funds, Dutch Prevention Funds, Dutch  
4 ZON (Zorg Onderzoek Nederland), World Cancer Research Fund (WCRF), Statistics  
5 Netherlands (The Netherlands); RK: Deutsche Krebshilfe.  
6  
7

8  
9  
10 *Ethical approval:* The study was approved by the IARC Institutional Review Board and by  
11 the local review boards of the participating centres.  
12

13  
14 *Data sharing:* No additional data available.  
15  
16  
17  
18  
19  
20  
21  
22  
23  
24  
25  
26  
27  
28  
29  
30  
31  
32  
33  
34  
35  
36  
37  
38  
39  
40  
41  
42  
43  
44  
45  
46  
47  
48  
49  
50  
51  
52  
53  
54  
55  
56  
57  
58  
59  
60

**Table 1** Self-rated health by centre in 3,399 incident cases of type 2 diabetes mellitus and 4,619 participants in the subcohort in the EPIC-InterAct study. Data shown are numbers of individuals (percentage).

| Centre     |           | Self-rated health |            |            |          |
|------------|-----------|-------------------|------------|------------|----------|
|            |           | <i>High</i>       |            | <i>Low</i> |          |
|            |           | Excellent         | Good       | Moderate   | Poor     |
| Bilthoven  | Cases     | 13 (4.3)          | 184 (61.5) | 73 (24.4)  | 29 (9.7) |
|            | Subcohort | 52 (9.0)          | 403 (70.0) | 101 (17.5) | 21 (3.6) |
| Cambridge  | Cases     | 92 (12.3)         | 428 (57.1) | 206 (27.5) | 24 (3.2) |
|            | Subcohort | 159 (16.2)        | 624 (63.4) | 170 (17.4) | 23 (2.3) |
| Heidelberg | Cases     | 173 (23.1)        | 395 (52.8) | 156 (20.9) | 24 (3.2) |
|            | Subcohort | 286 (32.9)        | 448 (51.5) | 125 (14.4) | 11 (1.3) |
| Potsdam    | Cases     | 118 (15.2)        | 460 (59.4) | 171 (22.1) | 26 (3.4) |
|            | Subcohort | 274 (23.1)        | 721 (60.9) | 164 (13.9) | 25 (2.1) |
| Umeå       | Cases     | 155 (18.7)        | 369 (44.6) | 236 (28.5) | 67 (8.1) |
|            | Subcohort | 265 (26.2)        | 477 (47.1) | 215 (21.2) | 55 (5.4) |



**Table 2** Baseline characteristics of subcohort individuals in the EPIC-InterAct study by categories of self-rated health. Data are presented as mean and standard deviations (SD) for continuous variables and percentages and frequencies for categorical variables.

|                                         | Self-rated health |       |        |       |            |       |        |       | <i>p</i> -value for overall difference* |
|-----------------------------------------|-------------------|-------|--------|-------|------------|-------|--------|-------|-----------------------------------------|
|                                         | <i>High</i>       |       |        |       | <i>Low</i> |       |        |       |                                         |
|                                         | Excellent         |       | Good   |       | Moderate   |       | Poor   |       |                                         |
|                                         | Mean/%            | SD/N  | Mean/% | SD/N  | Mean/%     | SD/N  | Mean/% | SD/N  |                                         |
| Age (years)                             | 48.8              | 10.3  | 50.5   | 11.1  | 51.7       | 10.9  | 50.3   | 10.2  | <0.001                                  |
| Sex (% men)                             | 42.8              | 443   | 45.2   | 1208  | 44.8       | 347   | 37.8   | 51    | 0.24                                    |
| Educational level (%)                   |                   |       |        |       |            |       |        |       | <0.001                                  |
| <i>Primary school or none</i>           | 19.2              | 194   | 24.4   | 635   | 37.9       | 287   | 30.8   | 40    |                                         |
| <i>Technical/professional school</i>    | 34.6              | 351   | 35.0   | 910   | 29.6       | 224   | 32.3   | 42    |                                         |
| <i>Secondary school</i>                 | 14.9              | 151   | 14.2   | 369   | 14.4       | 109   | 18.5   | 24    |                                         |
| <i>Higher (incl. university degree)</i> | 31.3              | 317   | 26.4   | 688   | 18.1       | 137   | 18.5   | 24    |                                         |
| BMI (kg/m <sup>2</sup> )                | 24.8              | 3.4   | 25.5   | 4.0   | 26.2       | 4.5   | 25.6   | 5.4   | <0.001                                  |
| Smoking status (%)                      |                   |       |        |       |            |       |        |       | <0.001                                  |
| <i>Never</i>                            | 52.1              | 540   | 46.6   | 1246  | 41.7       | 323   | 40.7   | 55    |                                         |
| <i>Former</i>                           | 27.5              | 285   | 30.1   | 804   | 30.1       | 233   | 23.7   | 32    |                                         |
| <i>Current</i>                          | 18.8              | 195   | 21.0   | 561   | 26.1       | 202   | 32.6   | 44    |                                         |
| <i>Unknown</i>                          | 1.5               | 16    | 2.3    | 62    | 2.2        | 17    | 3.0    | 4     |                                         |
| Physical activity (%)                   |                   |       |        |       |            |       |        |       | <0.001                                  |
| <i>Inactive</i>                         | 15.9              | 160   | 21.3   | 548   | 31.1       | 231   | 43.3   | 52    |                                         |
| <i>Moderately inactive</i>              | 33.2              | 335   | 31.7   | 818   | 28.8       | 214   | 29.2   | 35    |                                         |
| <i>Moderately active</i>                | 25.5              | 257   | 26.8   | 689   | 21.8       | 162   | 15.0   | 18    |                                         |
| <i>Active</i>                           | 25.5              | 257   | 20.2   | 521   | 18.2       | 135   | 12.5   | 15    |                                         |
| Alcohol consumption (g/d)               | 11.5              | 16.2  | 10.8   | 15.2  | 9.2        | 15.4  | 5.6    | 9.8   | <0.001                                  |
| Total energy intake (kcal)              | 2016.6            | 649.7 | 2056.7 | 618.3 | 2009.4     | 617.3 | 1928.3 | 617.9 | 0.007                                   |
| Hypertension (%)                        | 16.0              | 165   | 22.8   | 600   | 32.7       | 245   | 33.3   | 44    | <0.001                                  |
| History of myocardial infarction (%)    | 0.4               | 4     | 1.5    | 40    | 3.6        | 28    | 3.7    | 5     | <0.001                                  |

\*Comparing excellent, good, moderate, and poor self-rated health

**Table 3** Pooled hazard ratios of incident T2DM comparing low (moderate or poor) versus high (excellent or good) self-rated health.

|                                   | High self-rated health | Low self-rated health |
|-----------------------------------|------------------------|-----------------------|
|                                   | Pooled HR (95% CI)     | Pooled HR (95% CI)*   |
| Model 1: Adjusted for age and sex | 1.00 (referent)        | 1.67 (1.48 to 1.88)   |
| Model 1 + education               | 1.00 (referent)        | 1.60 (1.42 to 1.81)   |
| Model 1 + BMI                     | 1.00 (referent)        | 1.38 (1.19 to 1.60)   |
| Model 1 + smoking                 | 1.00 (referent)        | 1.67 (1.48 to 1.89)   |
| Model 1 + physical activity       | 1.00 (referent)        | 1.59 (1.41 to 1.80)   |
| Model 1 + alcohol consumption     | 1.00 (referent)        | 1.67 (1.48 to 1.89)   |
| Model 1 + energy intake           | 1.00 (referent)        | 1.67 (1.48 to 1.88)   |
| Model 1 + hypertension            | 1.00 (referent)        | 1.48 (1.31 to 1.69)   |
| Model 1 + all covariates above    | 1.00 (referent)        | 1.29 (1.09 to 1.53)   |

\*Pooled hazard ratios calculated using a centre-stratified approach in combination with a random effects meta-analysis.

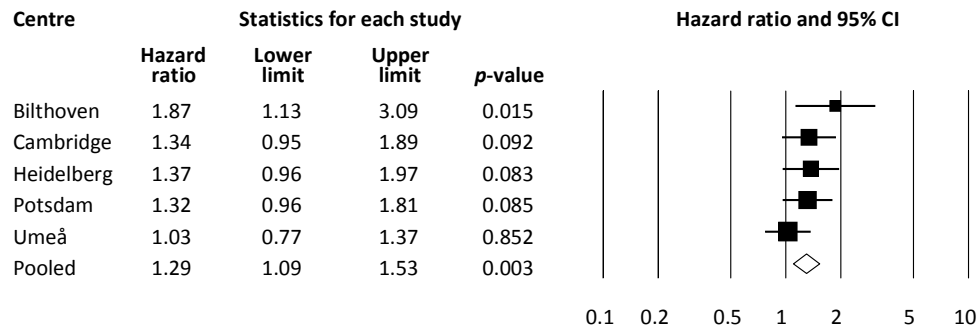

p-value for heterogeneity 0.33,  $I^2$  index 13.3%

**Figure 1** Centre-specific and pooled hazard ratios of incident T2DM adjusted for the variables in the final model (age, sex, education, BMI, smoking, physical activity, alcohol consumption, energy intake and hypertension).

## **FUNDING**

Funded by EU FP6 programme

## **CONTRIBUTORSHIP**

PW had access to all data for this study, analysed the data, drafted the manuscript and is the guarantor. All authors qualify for authorship according to BMJ Open criteria. They have all contributed to conception and design, and interpretation of data, revising the article critically for important intellectual content and final approval of the version to be published.

## **COMPETING INTERESTS**

None

## DATA SHARING

No additional data available.

## References

1. Danaei G, Finucane MM, Lu Y, Singh GM, Cowan MJ, Paciorek CJ, et al. National, regional, and global trends in fasting plasma glucose and diabetes prevalence since 1980: systematic analysis of health examination surveys and epidemiological studies with 370 country-years and 2.7 million participants. *Lancet* 2011;378(9785):31-40.
2. Shaw JE, Sicree RA, Zimmet PZ. Global estimates of the prevalence of diabetes for 2010 and 2030. *Diabetes Res Clin Pract* 2010;87(1):4-14.
3. Idler EL, Benyamini Y. Self-rated health and mortality: a review of twenty-seven community studies. *J. Health Soc. Behav.* 1997;38(1):21-37.
4. Benyamini Y. Why does self-rated health predict mortality? An update on current knowledge and a research agenda for psychologists. *Psychol Health* 2011;26(11):1407-13.
5. Halford C, Anderzen I, Arnetz B. Endocrine measures of stress and self-rated health: a longitudinal study. *J Psychosom Res* 2003;55(4):317-20.
6. DeSalvo KB, Blosner N, Reynolds K, He J, Muntner P. Mortality prediction with a single general self-rated health question. A meta-analysis. *J Gen Intern Med* 2006;21(3):267-75.
7. Mavaddat N, Kinmonth AL, Sanderson S, Surtees P, Bingham S, Khaw KT. What determines Self-Rated Health (SRH)? A cross-sectional study of SF-36 health domains in the EPIC-Norfolk cohort. *J Epidemiol Community Health* 2011;65(9):800-6.
8. DeSalvo KB, Jones TM, Peabody J, McDonald J, Fihn S, Fan V, et al. Health care expenditure prediction with a single item, self-rated health measure. *Med Care* 2009;47(4):440-7.
9. Ramkumar A, Quah JL, Wong T, Yeo LS, Nieh CC, Shankar A, et al. Self-rated health, associated factors and diseases: a community-based cross-sectional study of Singaporean adults aged 40 years and above. *Ann. Acad. Med. Singapore* 2009;38(7):606-7.
10. Shadbolt B. Some correlates of self-rated health for Australian women. *Am J Public Health* 1997;87(6):951-6.
11. Manor O, Matthews S, Power C. Self-rated health and limiting longstanding illness: inter-relationships with morbidity in early adulthood. *Int J Epidemiol* 2001;30(3):600-7.
12. Leosdottir M, Willenheimer R, Persson M, Nilsson PM. The association between glucometabolic disturbances, traditional cardiovascular risk factors and self-rated health by age and gender: a cross-sectional analysis within the Malmo Preventive Project. *Cardiovasc Diabetol* 2011;10:118.
13. Tapp RJ, O'Neil A, Shaw JE, Zimmet PZ, Oldenburg BF. Is there a link between components of health-related functioning and incident impaired glucose metabolism and type 2 diabetes? The Australian Diabetes Obesity and Lifestyle (AusDiab) study. *Diabetes Care* 2010;33(4):757-62.
14. Riboli E, Hunt KJ, Slimani N, Ferrari P, Norat T, Fahey M, et al. European Prospective Investigation into Cancer and Nutrition (EPIC): study populations and data collection. *Public Health Nutr* 2002;5(6B):1113-24.
15. Langenberg C, Sharp S, Forouhi NG, Franks PW, Schulze MB, Kerrison N, et al. Design and cohort description of the InterAct Project: an examination of the interaction of genetic and lifestyle factors on the incidence of type 2 diabetes in the EPIC Study. *Diabetologia* 2011;54(9):2272-82.
16. Walker JD, Maxwell CJ, Hogan DB, Eby EM. Does self-rated health predict survival in older persons with cognitive impairment? *J. Am. Geriatr. Soc.* 2004;52(11):1895-900.

17. McEwen LN, Kim C, Haan MN, Ghosh D, Lantz PM, Thompson TJ, et al. Are health-related quality-of-life and self-rated health associated with mortality? Insights from Translating Research Into Action for Diabetes (TRIAD). *Prim Care Diabetes* 2009;3(1):37-42.
18. Lee SJ, Moody-Ayers SY, Landefeld CS, Walter LC, Lindquist K, Segal MR, et al. The relationship between self-rated health and mortality in older black and white Americans. *J. Am. Geriatr. Soc.* 2007;55(10):1624-9.
19. Pischon T, Boeing H, Hoffmann K, Bergmann M, Schulze MB, Overvad K, et al. General and abdominal adiposity and risk of death in Europe. *N Engl J Med* 2008;359(20):2105-20.
20. Validity of a short questionnaire to assess physical activity in 10 European countries. *Eur J Epidemiol* 2012;27(1):15-25.
21. Barlow WE, Ichikawa L, Rosner D, Izumi S. Analysis of case-cohort designs. *J Clin Epidemiol* 1999;52(12):1165-72.
22. Singh-Manoux A, Martikainen P, Ferrie J, Zins M, Marmot M, Goldberg M. What does self rated health measure? Results from the British Whitehall II and French Gazel cohort studies. *J. Epidemiol. Community Health* 2006;60(4):364-72.
23. Kenward MG, Carpenter J. Multiple imputation: current perspectives. *Stat. Methods Med. Res.* 2007;16(3):199-218.
24. Benjamins MR, Hummer RA, Eberstein IW, Nam CB. Self-reported health and adult mortality risk: an analysis of cause-specific mortality. *Soc Sci Med* 2004;59(6):1297-306.
25. Wennberg P, Rolandsson O, Jerden L, Boeing H, Sluik D, Kaaks R, et al. Self-rated health and mortality in individuals with diabetes mellitus: prospective cohort study. *BMJ Open* 2012;2(1):e000760.
26. Dasbach EJ, Klein R, Klein BE, Moss SE. Self-rated health and mortality in people with diabetes. *Am J Public Health* 1994;84(11):1775-9.
27. Prosper MH, Moczulski VL, Qureshi A. Obesity as a predictor of self-rated health. *Am J Health Behav* 2009;33(3):319-29.
28. Haffner SM. Relationship of metabolic risk factors and development of cardiovascular disease and diabetes. *Obesity (Silver Spring)* 2006;14 Suppl 3:121S-27S.
29. Krause NM, Jay GM. What do global self-rated health items measure? *Med Care* 1994;32(9):930-42.
30. Bailis DS, Segall A, Chipperfield JG. Two views of self-rated general health status. *Soc. Sci. Med.* 2003;56(2):203-17.
31. Gregg EW, Gu Q, Cheng YJ, Narayan KM, Cowie CC. Mortality trends in men and women with diabetes, 1971 to 2000. *Ann. Intern. Med.* 2007;147(3):149-55.
32. Vigneri P, Frasca F, Sciacca L, Pandini G, Vigneri R. Diabetes and cancer. *Endocr Relat Cancer* 2009;16(4):1103-23.
33. Layes A, Asada Y, Keparat G. Whiners and deniers - What does self-rated health measure? *Soc. Sci. Med.* 2011.
34. Benyamini Y, Blumstein T, Lusky A, Modan B. Gender differences in the self-rated health-mortality association: is it poor self-rated health that predicts mortality or excellent self-rated health that predicts survival? *Gerontologist* 2003;43(3):396-405; discussion 372-5.
35. Vadla D, Bozikov J, Akerstrom B, Cheung WY, Kovacic L, Masanovic M, et al. Differences in healthcare service utilisation in elderly, registered in eight districts of five European countries. *Scand J Public Health* 2011;39(3):272-9.
36. Jylha M, Guralnik JM, Ferrucci L, Jokela J, Heikkinen E. Is self-rated health comparable across cultures and genders? *J. Gerontol. B. Psychol. Sci. Soc. Sci.* 1998;53(3):S144-52.
37. Pencina MJ, D'Agostino RB, Sr., D'Agostino RB, Jr., Vasan RS. Evaluating the added predictive ability of a new marker: from area under the ROC curve to reclassification and beyond. *Stat. Med.* 2008;27(2):157-72; discussion 207-12.

## Appendix

All questionnaires were standardized to fit the question (with four response alternatives):

*How satisfied are you today with your health?*

1 Excellent

2 Good

3 Moderate

4 Poor

Description of the original questions and how they were standardized:

Bilthoven 1993–94

Question: *What do you think about your health in general?*

| Response alternatives          | Standardized  |
|--------------------------------|---------------|
| 1 Excellent                    | 1 Excellent   |
| 2 Good                         | 2 Good        |
| 3 Reasonable                   | 3 Moderate    |
| 4 Mediocre                     | 4 Poor        |
| 5 Poor                         | 4 Poor        |
| 9 More than 1 option indicated | Missing value |

Bilthoven 1995–97

Question: *What do you think about your health in general?*

| Response alternatives          | Standardized  |
|--------------------------------|---------------|
| 1 Excellent                    | 1 Excellent   |
| 2 Very good                    | 2 Good        |
| 3 Good                         | 2 Good        |
| 4 Reasonable                   | 3 Moderate    |
| 5 Mediocre                     | 4 Poor        |
| 9 More than 1 option indicated | Missing value |

Cambridge

Question: *How would you rate your general health?*

| Response alternatives | Standardized |
|-----------------------|--------------|
| 1 Excellent           | 1 Excellent  |
| 2 Good                | 2 Good       |
| 3 Moderate            | 3 Moderate   |

|        |        |
|--------|--------|
| 4 Poor | 4 Poor |
|--------|--------|

### Heidelberg

Question: *On the whole, how satisfied are you today with your health?*

| Response alternatives | Standardized  |
|-----------------------|---------------|
| 1 Very satisfied      | 1 Excellent   |
| 2 More satisfied      | 2 Good        |
| 3 More dissatisfied   | 3 Moderate    |
| 4 Very dissatisfied   | 4 Poor        |
| 8 Do not know         | Missing value |

### Potsdam

Question: *On the whole, how satisfied are you today with your health?*

| Response alternatives      | Standardized  |
|----------------------------|---------------|
| 1 Very satisfied           | 1 Excellent   |
| 2 More likely satisfied    | 2 Good        |
| 3 More likely dissatisfied | 3 Moderate    |
| 4 Very dissatisfied        | 4 Poor        |
| 8 Do not know              | Missing value |

### Umeå

Question: *How do you judge that your state of health has been in the last year?*

| Response alternatives | Standardized  |
|-----------------------|---------------|
| 1 Very well           | 1 Excellent   |
| 2 Quiet well          | 2 Good        |
| 3 Fairly well         | 3 Moderate    |
| 4 Quiet bad           | 4 Poor        |
| 5 Bad                 | 4 Poor        |
| 9 Inconsistent answer | Missing value |

## STROBE Statement—checklist of items that should be included in reports of observational studies

|                              | Item No | Recommendation                                                                                                                                                                                                                                                                                                                                                                                                                                                                                                                                                                                                                                                                                   |
|------------------------------|---------|--------------------------------------------------------------------------------------------------------------------------------------------------------------------------------------------------------------------------------------------------------------------------------------------------------------------------------------------------------------------------------------------------------------------------------------------------------------------------------------------------------------------------------------------------------------------------------------------------------------------------------------------------------------------------------------------------|
| <b>Title and abstract</b>    | 1       | (a) Indicate the study's design with a commonly used term in the title or the abstract<br>(b) Provide in the abstract an informative and balanced summary of what was done and what was found                                                                                                                                                                                                                                                                                                                                                                                                                                                                                                    |
| <b>Introduction</b>          |         |                                                                                                                                                                                                                                                                                                                                                                                                                                                                                                                                                                                                                                                                                                  |
| Background/rationale         | 2       | Explain the scientific background and rationale for the investigation being reported                                                                                                                                                                                                                                                                                                                                                                                                                                                                                                                                                                                                             |
| Objectives                   | 3       | State specific objectives, including any prespecified hypotheses                                                                                                                                                                                                                                                                                                                                                                                                                                                                                                                                                                                                                                 |
| <b>Methods</b>               |         |                                                                                                                                                                                                                                                                                                                                                                                                                                                                                                                                                                                                                                                                                                  |
| Study design                 | 4       | Present key elements of study design early in the paper                                                                                                                                                                                                                                                                                                                                                                                                                                                                                                                                                                                                                                          |
| Setting                      | 5       | Describe the setting, locations, and relevant dates, including periods of recruitment, exposure, follow-up, and data collection                                                                                                                                                                                                                                                                                                                                                                                                                                                                                                                                                                  |
| Participants                 | 6       | (a) <i>Cohort study</i> —Give the eligibility criteria, and the sources and methods of selection of participants. Describe methods of follow-up<br><i>Case-control study</i> —Give the eligibility criteria, and the sources and methods of case ascertainment and control selection. Give the rationale for the choice of cases and controls<br><i>Cross-sectional study</i> —Give the eligibility criteria, and the sources and methods of selection of participants<br>(b) <i>Cohort study</i> —For matched studies, give matching criteria and number of exposed and unexposed<br><i>Case-control study</i> —For matched studies, give matching criteria and the number of controls per case |
| Variables                    | 7       | Clearly define all outcomes, exposures, predictors, potential confounders, and effect modifiers. Give diagnostic criteria, if applicable                                                                                                                                                                                                                                                                                                                                                                                                                                                                                                                                                         |
| Data sources/<br>measurement | 8*      | For each variable of interest, give sources of data and details of methods of assessment (measurement). Describe comparability of assessment methods if there is more than one group                                                                                                                                                                                                                                                                                                                                                                                                                                                                                                             |
| Bias                         | 9       | Describe any efforts to address potential sources of bias                                                                                                                                                                                                                                                                                                                                                                                                                                                                                                                                                                                                                                        |
| Study size                   | 10      | Explain how the study size was arrived at                                                                                                                                                                                                                                                                                                                                                                                                                                                                                                                                                                                                                                                        |
| Quantitative variables       | 11      | Explain how quantitative variables were handled in the analyses. If applicable, describe which groupings were chosen and why                                                                                                                                                                                                                                                                                                                                                                                                                                                                                                                                                                     |
| Statistical methods          | 12      | (a) Describe all statistical methods, including those used to control for confounding<br>(b) Describe any methods used to examine subgroups and interactions<br>(c) Explain how missing data were addressed<br>(d) <i>Cohort study</i> —If applicable, explain how loss to follow-up was addressed<br><i>Case-control study</i> —If applicable, explain how matching of cases and controls was addressed<br><i>Cross-sectional study</i> —If applicable, describe analytical methods taking account of sampling strategy<br>(e) Describe any sensitivity analyses                                                                                                                                |

Continued on next page



**Results**

|                  |     |                                                                                                                                                                                                                                                                                                                                                                                                               |
|------------------|-----|---------------------------------------------------------------------------------------------------------------------------------------------------------------------------------------------------------------------------------------------------------------------------------------------------------------------------------------------------------------------------------------------------------------|
| Participants     | 13* | (a) Report numbers of individuals at each stage of study—eg numbers potentially eligible, examined for eligibility, confirmed eligible, included in the study, completing follow-up, and analysed<br>(b) Give reasons for non-participation at each stage<br>(c) Consider use of a flow diagram                                                                                                               |
| Descriptive data | 14* | (a) Give characteristics of study participants (eg demographic, clinical, social) and information on exposures and potential confounders<br>(b) Indicate number of participants with missing data for each variable of interest<br>(c) <i>Cohort study</i> —Summarise follow-up time (eg, average and total amount)                                                                                           |
| Outcome data     | 15* | <i>Cohort study</i> —Report numbers of outcome events or summary measures over time<br><i>Case-control study</i> —Report numbers in each exposure category, or summary measures of exposure<br><i>Cross-sectional study</i> —Report numbers of outcome events or summary measures                                                                                                                             |
| Main results     | 16  | (a) Give unadjusted estimates and, if applicable, confounder-adjusted estimates and their precision (eg, 95% confidence interval). Make clear which confounders were adjusted for and why they were included<br>(b) Report category boundaries when continuous variables were categorized<br>(c) If relevant, consider translating estimates of relative risk into absolute risk for a meaningful time period |
| Other analyses   | 17  | Report other analyses done—eg analyses of subgroups and interactions, and sensitivity analyses                                                                                                                                                                                                                                                                                                                |

**Discussion**

|                  |    |                                                                                                                                                                            |
|------------------|----|----------------------------------------------------------------------------------------------------------------------------------------------------------------------------|
| Key results      | 18 | Summarise key results with reference to study objectives                                                                                                                   |
| Limitations      | 19 | Discuss limitations of the study, taking into account sources of potential bias or imprecision. Discuss both direction and magnitude of any potential bias                 |
| Interpretation   | 20 | Give a cautious overall interpretation of results considering objectives, limitations, multiplicity of analyses, results from similar studies, and other relevant evidence |
| Generalisability | 21 | Discuss the generalisability (external validity) of the study results                                                                                                      |

**Other information**

|         |    |                                                                                                                                                               |
|---------|----|---------------------------------------------------------------------------------------------------------------------------------------------------------------|
| Funding | 22 | Give the source of funding and the role of the funders for the present study and, if applicable, for the original study on which the present article is based |
|---------|----|---------------------------------------------------------------------------------------------------------------------------------------------------------------|

\*Give information separately for cases and controls in case-control studies and, if applicable, for exposed and unexposed groups in cohort and cross-sectional studies.

**Note:** An Explanation and Elaboration article discusses each checklist item and gives methodological background and published examples of transparent reporting. The STROBE checklist is best used in conjunction with this article (freely available on the Web sites of PLoS Medicine at <http://www.plosmedicine.org/>, Annals of Internal Medicine at <http://www.annals.org/>, and Epidemiology at <http://www.epidem.com/>). Information on the STROBE Initiative is available at [www.strobe-statement.org](http://www.strobe-statement.org).



## Self-rated Health and Type 2 Diabetes Risk in the EPIC-InterAct Study: a case-cohort study

|                                 |                                                                                                                                                                                                                                                                                                                                                                                                                                                                                                                                                                                                                                                                                                                                                                                                                                                                                                                                                                                                                                                                                                                                                                                                                                                                                                                                    |
|---------------------------------|------------------------------------------------------------------------------------------------------------------------------------------------------------------------------------------------------------------------------------------------------------------------------------------------------------------------------------------------------------------------------------------------------------------------------------------------------------------------------------------------------------------------------------------------------------------------------------------------------------------------------------------------------------------------------------------------------------------------------------------------------------------------------------------------------------------------------------------------------------------------------------------------------------------------------------------------------------------------------------------------------------------------------------------------------------------------------------------------------------------------------------------------------------------------------------------------------------------------------------------------------------------------------------------------------------------------------------|
| Journal:                        | <i>BMJ Open</i>                                                                                                                                                                                                                                                                                                                                                                                                                                                                                                                                                                                                                                                                                                                                                                                                                                                                                                                                                                                                                                                                                                                                                                                                                                                                                                                    |
| Manuscript ID:                  | bmjopen-2012-002436.R1                                                                                                                                                                                                                                                                                                                                                                                                                                                                                                                                                                                                                                                                                                                                                                                                                                                                                                                                                                                                                                                                                                                                                                                                                                                                                                             |
| Article Type:                   | Research                                                                                                                                                                                                                                                                                                                                                                                                                                                                                                                                                                                                                                                                                                                                                                                                                                                                                                                                                                                                                                                                                                                                                                                                                                                                                                                           |
| Date Submitted by the Author:   | 30-Jan-2013                                                                                                                                                                                                                                                                                                                                                                                                                                                                                                                                                                                                                                                                                                                                                                                                                                                                                                                                                                                                                                                                                                                                                                                                                                                                                                                        |
| Complete List of Authors:       | Wennberg, Patrik; Umeå University, Public Health and Clinical Medicine, Family Medicine<br>Rolandsson, Olov; Umeå University, Public Health and Clinical Medicine, Family Medicine<br>van der A, Daphne; National Institute for Public Health and the Environment, Centre for Prevention and Health Services Research<br>Spijkerman, Annemieke; National Institute for Public Health and the Environment, Centre for Prevention and Health Services Research<br>Kaaks, Rudolf; German Cancer Research, CenterDivision of Cancer Epidemiology<br>Boeing, Heiner; German Institute of Human Nutrition Potsdam-Rehbrücke, Department of Epidemiology<br>Feller, Silke; German Institute of Human Nutrition Potsdam-Rehbrücke, Department of Epidemiology<br>Bergmann, Manuela; German Institute of Human Nutrition Potsdam-Rehbrücke, Department of Epidemiology<br>Langenberg, Claudia; Institute of Metabolic Science, Addenbrooke's Hospital,, MRC Epidemiology Unit<br>Sharp, Stephen; University of Cambridge, ; Institute of Metabolic Science, Addenbrooke's Hospital,, MRC Epidemiology Unit<br>Forouhi, Nita; MRC Epidemiology Unit,<br>Riboli, Elio; Imperial College London, Department of Epidemiology & Biostatistics, School of Public Health<br>Wareham, Nicholas; University of Cambridge, Institute of Public Health |
| <b>Primary Subject Heading</b>: | Diabetes and endocrinology                                                                                                                                                                                                                                                                                                                                                                                                                                                                                                                                                                                                                                                                                                                                                                                                                                                                                                                                                                                                                                                                                                                                                                                                                                                                                                         |
| Secondary Subject Heading:      | Public health                                                                                                                                                                                                                                                                                                                                                                                                                                                                                                                                                                                                                                                                                                                                                                                                                                                                                                                                                                                                                                                                                                                                                                                                                                                                                                                      |
| Keywords:                       | DIABETES & ENDOCRINOLOGY, General diabetes < DIABETES & ENDOCRINOLOGY, PREVENTIVE MEDICINE                                                                                                                                                                                                                                                                                                                                                                                                                                                                                                                                                                                                                                                                                                                                                                                                                                                                                                                                                                                                                                                                                                                                                                                                                                         |
|                                 |                                                                                                                                                                                                                                                                                                                                                                                                                                                                                                                                                                                                                                                                                                                                                                                                                                                                                                                                                                                                                                                                                                                                                                                                                                                                                                                                    |

1  
2  
3 **Self-rated Health and Type 2 Diabetes Risk in the EPIC-InterAct Study: a**  
4 **case-cohort study**  
5  
6  
7

8 P. Wennberg 1; O. Rolandsson 1; D.L. van der A 2; A.W. Spijkerman 2; R. Kaaks 3; H.  
9 Boeing 4; S. Feller 4; M.M. Bergmann 4; C. Langenberg 5; S.J. Sharp 5; N. Forouhi 5; E.  
10 Riboli 6; N. Wareham 5  
11

12  
13 1. Department of Public Health and Clinical Medicine, Umeå University, Umeå, Sweden;  
14 2. National Institute for Public Health and the Environment, Centre for Prevention and  
15 Health Services Research, Bilthoven, The Netherlands; 3. Division of Cancer  
16 Epidemiology, German Cancer Research Center, Heidelberg, Germany; 4. Department of  
17 Epidemiology, German Institute of Human Nutrition Potsdam-Rehbrücke, Nuthetal,  
18 Germany; 5. MRC Epidemiology Unit, Institute of Metabolic Science, Addenbrooke's  
19 Hospital, Cambridge, United Kingdom; 6. Department of Epidemiology & Biostatistics,  
20 School of Public Health, Imperial College London, London, United Kingdom.  
21  
22  
23  
24  
25  
26  
27  
28  
29  
30  
31

32 Correspondence: P. Wennberg  
33

34 Address: Portstigen 24, 931 51 Skellefteå, Sweden  
35  
36

37 Fax: +46 90 776883, Telephone: +46 90 7851423  
38  
39

40 E-mail: patrik.wennberg@famned.umu.se  
41  
42

43 Key words: Type 2 diabetes, self-rated health, prevention, case-cohort  
44

45 Word count (main text): 3533  
46  
47

48 Word count (abstract): 260  
49  
50  
51  
52  
53  
54  
55  
56  
57  
58  
59  
60

1  
2  
3 The Corresponding Author has the right to grant on behalf of all authors and does grant  
4 on behalf of all authors, an exclusive licence (or non-exclusive for government  
5 employees) on a worldwide basis to the BMJ Publishing Group Ltd and its Licensees to  
6 permit this article (if accepted) to be published in BMJ Open and any other BMJPG  
7 products to exploit all subsidiary rights, as set out in our licence (  
8 [http://group.bmj.com/products/journals/instructions-for-](http://group.bmj.com/products/journals/instructions-for-authors/wholly_owned_licence.pdf)  
9 [authors/wholly\\_owned\\_licence.pdf](http://group.bmj.com/products/journals/instructions-for-authors/wholly_owned_licence.pdf).) and the Corresponding Author accepts and  
10 understands that any supply made under these terms is made by BMJPG to the  
11 Corresponding Author.  
12  
13  
14  
15  
16  
17  
18  
19  
20  
21  
22  
23  
24  
25  
26  
27  
28  
29  
30  
31  
32  
33  
34  
35  
36  
37  
38  
39  
40  
41  
42  
43  
44  
45  
46  
47  
48  
49  
50  
51  
52  
53  
54  
55  
56  
57  
58  
59  
60

**Abstract**

**Objectives** To investigate the association between self-rated health and risk of type 2 diabetes and whether the strength of this association is consistent across five European centres.

**Design** Population-based prospective case-cohort study.

**Setting** Enrolment took place between 1992 and 2000 in five European centres (Bilthoven, Cambridge, Heidelberg, Potsdam, Umeå).

**Participants** Self-rated health was assessed by baseline questionnaire in 3,399 incident type 2 diabetic case participants and a centre-stratified subcohort of 4,619 individuals from the EPIC-InterAct study which was drawn from a total cohort of 340,234 participants in the European Prospective Investigation into Cancer and Nutrition (EPIC).

**Primary outcome measure** Prentice-weighted Cox regression was used to estimate centre-specific hazard ratios (HRs) and 95% confidence intervals (CIs) for incident type 2 diabetes controlling for age, sex, centre, education, BMI, smoking, alcohol consumption, energy intake, physical activity, and hypertension. The centre-specific HRs were pooled across centres by random effects meta-analysis.

**Results** Low self-rated health was associated with a higher hazard of type 2 diabetes after adjusting for age and sex (pooled HR 1.67, 95% CI 1.48 to 1.88). After additional adjustment for health-related variables including BMI, the association was attenuated but remained statistically significant (pooled HR 1.29, 95% CI 1.09 to 1.53).  $I^2$  index for heterogeneity across centres was 13.3% ( $p=0.33$ ).

**Conclusions** Low self-rated health was associated with a higher risk of type 2 diabetes. The association could be only partly explained by other health-related variables, of which obesity was the strongest. We found no indication of heterogeneity in the association between self-rated health and type 2 diabetes mellitus across the European centres.

## Article Summary

### Article focus

- Self-rated health has been widely used as a global health measure. Several cross-sectional studies have suggested an association between low self-rated health and type 2 diabetes mellitus.
- We aimed to prospectively investigate the association between self-rated health and risk of type 2 diabetes and whether the strength of this association is consistent across five European centres. A population-based case-cohort study design was used in the study.

### Key messages

- Results from this study provide some evidence that low self-rated health is associated with a higher risk of type 2 diabetes mellitus. The association could be only partly explained by other health-related variables, of which obesity was the strongest.
- We found no indication of heterogeneity in the association between self-rated health and type 2 diabetes mellitus across centres.

### Strength and limitations

- The study used a thorough ascertainment and verification of type 2 diabetes mellitus cases and included populations from four different European countries.
- The assessment of self-rated health differed somewhat between centres regarding the construct (formulation, response alternatives and time frames) of the self-rated health question.

## Introduction

The prevalence of type 2 diabetes mellitus (T2DM) worldwide has more than doubled since 1980.<sup>1</sup> In 2010, it was estimated that over 250 million people suffered from T2DM.<sup>2</sup> Several risk factors have been identified (e.g. age, BMI, family history and physical inactivity) but the aetiology of T2DM is complex and still largely unknown. Self-rated health (SRH) is a subjective measure of health usually defined by responses to a single question such as "How do you rate your health?". SRH is suggested to capture physical, psychological and social aspects that may be difficult to assess by objective health measurements<sup>3</sup>. Furthermore, SRH has been associated with "bodily sensations and symptoms that can reflect disease in clinical or pre-clinical stages".<sup>4-5</sup> Individuals with poor SRH tend to have higher mortality,<sup>3 6</sup> poorer physical activity<sup>7</sup> and higher health care utilization<sup>8</sup> than individuals rating their health as excellent or good. It is likely that individuals with poor SRH face larger or different barriers to adopt a healthy lifestyle, which may be of relevance to how prevention efforts should be targeted. Several cross-sectional studies in different populations have reported associations between poor SRH and prevalent diabetes<sup>9-11</sup> or glucometabolic disturbance.<sup>12</sup> The primary aim of this study was to investigate the association between SRH and risk of T2DM. As a secondary aim, we investigated whether the strength of this association was consistent across five European centres. A few previous prospective studies have evaluated the association between SRH and incidence of T2DM. A study by Tapp et al.<sup>13</sup> showed that poorer SRH is associated with newly diagnosed T2DM after a five year follow-up<sup>13</sup>, but the study was limited by high loss to follow-up. In a recent study, Latham and Peek found that SRH was a significant predictor for six major chronic diseases, including diabetes, among late midlife U.S. adults.<sup>14</sup> However, the outcome assessment in the study was based on self-reports, which makes the measurement susceptible for misclassification. The EPIC-InterAct Study is a large case-cohort study with thorough ascertainment and verification of T2DM that provides an ideal setting to investigate the association between SRH and T2DM across several European countries.

## Methods

### *Study population*

The InterAct Project was initiated to investigate how genetic and lifestyle behavioural factors, particularly diet and physical activity, interact on the risk of developing diabetes and how knowledge about such interactions may be translated into preventive action. The EPIC-InterAct case-cohort study was nested in the European Prospective Investigation into Cancer and Nutrition (EPIC), which in total consists of 519,978 men and women across Europe.<sup>15</sup> Out of these, 340,234 participants were eligible for the EPIC-InterAct study, which includes centres from eight different European countries (Denmark, France, Germany, Italy, the Netherlands, Spain, Sweden and the United Kingdom). A detailed description of the study design and methods can be found elsewhere.<sup>16</sup> In the present analysis we only included centres that had baseline data available on self-rated health (Germany: Heidelberg and Potsdam; the U.K.: Cambridge; the Netherlands: Bilthoven; Sweden: Umeå). Participants were enrolled between 1992 and 2000. An overview of the five centres is presented in **Table 1**. Among the participants from the five centres included in this study, 3,399 incident T2DM cases and a subcohort of 4,619 individuals remained after exclusions (**Figure 1**). Due to the random nature of the case-cohort design applied in the present study, the subcohort also included 140 individuals who developed T2DM during follow-up. All participants gave written consent and the study was approved by the ethical review board of the International Agency for Research on Cancer and by the local review boards of the participating centres.

### *Ascertainment of T2DM cases*

Incident cases of T2DM until 31 December 2007 were ascertained and verified at each EPIC centre participating in the Epic-InterAct project using follow-up questionnaires (T2DM diagnosed by a medical doctor or anti-diabetic drug use), linkage to primary and



1  
2  
3 secondary care registers, medication use (prescription registers), hospital admission and  
4 mortality data, and individual medical-record review at some centres. To increase the  
5 specificity of the case definition and to avoid inclusion in the study based on self-report of  
6 T2DM alone, further evidence was sought for all incident cases of T2DM. T2DM cases  
7 were included in the study only if confirmation of the diagnosis was secured from no less  
8 than two independent sources. Cases in Umeå were not ascertained by self-report, but  
9 identified via local and national diabetes and pharmaceutical registers and hence all  
10 ascertained cases were considered to be verified.<sup>16</sup>  
11  
12  
13  
14  
15  
16  
17  
18  
19

#### 20 *Assessment of self-rated health*

21 SRH was assessed at baseline using self-administered questionnaires in the native  
22 language. The questionnaires were somewhat differently formulated at each centre and  
23 were therefore standardized (described in **Appendix**). Given the low frequency of  
24 responses in the extreme categories (n=305 in the lowest category) we dichotomized the  
25 SRH variable in the analysis by combining the two highest categories (high SRH) and the  
26 two lowest categories (low SRH) in order to increase statistical power. This is also in  
27 conformity with previous research.<sup>17-19</sup>  
28  
29  
30  
31  
32  
33  
34  
35  
36

#### 37 *Assessment of covariates*

38 Weight and height were measured with participants not wearing shoes. Each participant's  
39 body weight was corrected for clothing worn during measurement in order to reduce  
40 heterogeneity due to protocol differences among centres.<sup>20</sup> Body mass index (BMI) was  
41 calculated, as weight (kilograms) divided by height (metres) squared. Hypertension was  
42 defined as self-reported medical history of hypertension or hypertension (based on  
43 measurements or drug use) at baseline. Further health-related variables were collected  
44 using questionnaires including questions on educational level, smoking status (current  
45 smoker versus non-smoker or ex-smoker), diet, physical activity level, alcohol  
46 consumption, and previous myocardial infarction. Physical activity (PA) was assessed  
47  
48  
49  
50  
51  
52  
53  
54  
55  
56  
57  
58  
59  
60

1  
2  
3 using the Cambridge index, a validated ordered categorical global index of activity  
4 derived from simple questions assessing recreational and occupational activity.<sup>21</sup>  
5  
6  
7

### 8 9 *Statistical analysis*

10 The association between SRH and various baseline characteristics within the subcohort  
11 was tested using a chi-square test (for categorical variables) and a Kruskal-Wallis test  
12 (for continuous variables). Cox proportional hazards regression, modified for the case-  
13 cohort design according to the Prentice method,<sup>22</sup> was used to estimate centre-specific  
14 hazard ratios (HRs) and 95% confidence intervals (CI) for the association between SRH  
15 and T2DM. Age was used as the primary time variable, with entry time defined as the  
16 participant's age in years at recruitment and exit time as the participant's age in years at  
17 date of diagnosis, death or censoring. The centre-specific HRs were then pooled across  
18 centres by random effects meta-analysis.  
19  
20  
21  
22  
23  
24  
25  
26  
27

28  
29 It is not clear whether SRH mechanistically operates as an indicator of some unmeasured  
30 process or as a summary of a large number of other measures.<sup>3 23</sup> Therefore, a large set  
31 of covariates were considered as potential confounders and included in models to  
32 determine pooled HRs at different levels of adjustment. All models were adjusted for age  
33 and sex. Each model was then further adjusted for the other health-related variables,  
34 one at a time and finally, all potential confounders in the same model. Education level,  
35 smoking status, physical activity and hypertension were included as categorical variables,  
36 whereas BMI, alcohol consumption and energy intake were included as continuous  
37 variables.  $I^2$  – the percentage of variation between centres due to heterogeneity – was  
38 calculated. A possible interaction between SRH and sex on T2DM incidence was tested by  
39 introducing an interaction term in the regression analysis. We conducted a sensitivity  
40 analysis by excluding participants who were diagnosed with T2DM within two years of  
41 follow-up. In a second sensitivity analysis we excluded all participants with history of  
42 myocardial infarction at baseline. To investigate the impact of excluding 323 T2DM cases  
43 and 405 members of the subcohort with missing data on covariates, a third sensitivity  
44  
45  
46  
47  
48  
49  
50  
51  
52  
53  
54  
55  
56  
57  
58  
59  
60

1  
2  
3 analysis was conducted by multiple imputation of missing data considered missing at  
4 random (based on 5, 10 and 50 imputations) in cases and non-cases. For each variable  
5 with missing data, a predictive model was created among participants with no missing  
6 data; that model was then used to predict values for participants who were missing those  
7 data.<sup>24</sup> All analyses were performed using Stata 11.2, except for the random effects  
8 meta-analysis which was performed using Comprehensive Meta-Analysis version 2.  
9  
10  
11  
12  
13

## 14 15 16 17 18 **Results**

19  
20 The mean follow-up time was 9.1 years ( $\pm$  3.8). SRH by centre in incident cases of  
21 T2DM and subcohort individuals is presented in **Table 2**. **Table 3** shows the baseline  
22 characteristics of individuals in the subcohort by categories of SRH. Participants with low  
23 SRH were younger, had lower educational level and a higher BMI than participants with  
24 high SRH. Moreover, participants with low SRH were more often smokers, less physically  
25 active, had lower alcohol consumption and estimated reported energy intake, and more  
26 frequently had hypertension and a history of myocardial infarction than persons with  
27 high SRH.  
28  
29  
30  
31  
32  
33  
34  
35  
36  
37

38 In a model with adjustment for age and centre, low SRH was associated with a higher  
39 hazard of T2DM (HR 1.67, 95% CI 1.48 to 1.88) (**Table 4**). We found no significant  
40 interaction between SRH and sex on T2DM incidence ( $p=0.54$ ) and the analyses were  
41 therefore not stratified by sex. The strength of the association between SRH and T2DM  
42 was mainly unaffected by adjustment for smoking, alcohol consumption and estimated  
43 reported energy intake. Adjustment for other health-related variables, BMI in particular,  
44 led to attenuation of the association (adding BMI to the model attenuated the pooled HR  
45 to 1.38, 95% CI 1.19 to 1.60). In a final model with adjustment for age, sex, education,  
46 BMI, smoking, physical activity, alcohol consumption, estimated reported energy intake  
47 and hypertension, the association was attenuated but remained significant (HR 1.29,  
48 95% CI 1.09 to 1.53). The centre-specific HRs and the pooled HR based on the final  
49  
50  
51  
52  
53  
54  
55  
56  
57  
58  
59  
60

1  
2  
3 model are presented in **Figure 2**. We found no indication of heterogeneity in the  
4 association between SRH and T2DM across centres ( $I^2$  index 13.3%,  $p=0.33$ ).  
5  
6

7  
8 In a first sensitivity analysis we excluded participants who were diagnosed with T2DM  
9 within two years of follow-up ( $n=398$ ). These exclusions had only minor effect on the  
10 pooled HR (1.29, 95% CI 1.08 to 1.55, adjusted for the variables in the final model). The  
11 number of participants with history of myocardial infarction was low ( $n=202$ ) and the  
12 multivariate model did not fit when this covariate was included. Thus, in the second  
13 sensitivity analysis we excluded all participants with a history of myocardial infarction at  
14 baseline. This did not change the conclusions (pooled HR 1.27, 95% CI 1.08 to 1.50,  
15 adjusted for the variables in the final model). Because of missing data on covariates, 323  
16 T2DM cases and 405 members of the subcohort were excluded from analyses. As a third  
17 sensitivity analysis, multiple imputations of these data, assuming missingness at random,  
18 were conducted. No significant differences in results were found in datasets based on 5,  
19 10 or 50 imputations, compared to the original dataset. Therefore, it seems unlikely that  
20 the results are biased due to missing data.  
21  
22  
23  
24  
25  
26  
27  
28  
29  
30  
31  
32  
33  
34

### 35 **Discussion**

36  
37 In this prospective case-cohort study we found that low SRH was associated with a  
38 higher risk of T2DM. The association was partly explained by other health-related  
39 variables, particularly BMI. A somewhat unexpected finding was that the association  
40 between SRH and T2DM was mainly unaffected by adjustment for smoking, alcohol  
41 consumption and estimated reported energy intake. We found no indication of  
42 heterogeneity in the association between SRH and T2DM across the European centres.  
43  
44  
45  
46  
47

48  
49 SRH has been widely used as a global health measure. Previous studies on general  
50 populations have shown that there is a strong relationship between SRH and mortality,  
51 even after controlling for sociodemographic factors, objective measures of health status,  
52 and health behaviours<sup>6 25</sup>. A few studies have investigated the association between SRH  
53 and mortality in populations of diabetes patients with results similar to those of general  
54  
55  
56  
57  
58  
59  
60

1  
2  
3 populations<sup>18 26-27</sup>. SRH and prevalent diabetes have been associated in several cross-  
4  
5 sectional studies<sup>9-12 28</sup>. However, cross-sectional studies are limited by their inability to  
6  
7 study the temporal sequence of exposure and disease. Furthermore, these studies have  
8  
9 not separated type 2 and type 1 diabetes.

10  
11 Any causality cannot be established by an observational study, but the findings in this  
12  
13 prospective study imply that there is a dominant direction of this association from low  
14  
15 SRH to T2DM (i.e. a temporal relationship). We have only found two previous  
16  
17 prospective studies of the association between SRH and T2DM in large general  
18  
19 populations. In the Australian Diabetes Obesity and Lifestyle study, Tapp et al.<sup>13</sup> found  
20  
21 that participants with newly diagnosed diabetes had reported impaired general health  
22  
23 before the onset of T2DM. The study was limited by a shorter follow-up (5 years) and  
24  
25 they did not present any sensitivity analysis with exclusion of participants, who were  
26  
27 diagnosed with T2DM shortly after baseline, which makes a bidirectional association  
28  
29 more likely. In our study, with a mean follow-up of over 9 years, the association  
30  
31 between SRH and T2DM remained when we excluded participants who were diagnosed  
32  
33 with T2DM within two years of follow-up. Recently, Latham and Peek published a report  
34  
35 from the Health and Retirement Study, a longitudinal survey of a U.S. midlife cohort.<sup>14</sup>  
36  
37 They found that SRH predicted diabetes as well as coronary heart disease, stroke, lung  
38  
39 disease, and arthritis but not cancer. A weakness in the study was that the outcome  
40  
41 measurement was based on self-reports. Our study supports this previous prospective  
42  
43 research by showing an association between SRH and T2DM also when a strict  
44  
45 verification procedure for outcome measurement is applied.

46  
47 In the present study, low SRH was associated with a higher BMI which is in line with  
48  
49 previous research. In a study investigating the relationship between self-rated health  
50  
51 and obesity, Prosper et al. found that obese individuals had a 3-fold greater odds of  
52  
53 reporting reduced health compared to individuals with normal weight or overweight. As  
54  
55 obesity is also considered to be a major risk factor for diabetes<sup>29</sup>, obesity is likely to  
56  
57 explain a substantial part of the association between low SRH and T2DM. Thus, it is not  
58  
59  
60

1  
2  
3 surprising that BMI may act as an important confounder in the association between SRH  
4 and T2DM in this study -or as a mediator since SRH and obesity might be on the same  
5 causal pathway. More surprising was the fact that participants with low SRH had lower  
6 alcohol consumption and estimated reported energy intake. These findings are not easily  
7 explained and raise questions regarding the criteria for self-assessment. Previous  
8 research on occupational cohorts has suggested that SRH principally reflects physical  
9 and mental health problems and to a lesser extent age, early life factors, family history,  
10 sociodemographic variables, psychosocial factors, and health behaviours <sup>23</sup>. One study  
11 that used in-depth interviews found that the same frame of reference is not used by all  
12 respondents in answering this question <sup>30</sup>. Some study participants think about specific  
13 health problems when asked to rate their health, whereas others think in terms of either  
14 general physical functioning or health behaviours. In our study, the question for SRH  
15 referred to different time frames (e.g. satisfaction with health *today* in Germany and  
16 perception of health over the *last year* in Sweden). SRH has shown to be stable over  
17 time in population-based studies, suggesting that a considerable component of SRH  
18 reflects an aspect of one's enduring self-concept and to a lesser extent a spontaneous  
19 assessment of one's health status <sup>31</sup>. Thus, the impact of different time frames on SRH  
20 assessment is likely to be small.  
21  
22  
23  
24  
25  
26  
27  
28  
29  
30  
31  
32  
33  
34  
35  
36  
37

38 Compared to studies of SRH with mortality outcomes in individuals with diabetes <sup>18 26-27</sup>  
39 the strength of the SRH association (with T2DM incidence) found in the present study  
40 was weak. There may be several explanations for this. It has been shown that diabetes  
41 patients have higher mortality rates from several causes <sup>32</sup>, including cancer <sup>33</sup>. It is  
42 likely that the comparatively strong association between SRH and mortality is due to a  
43 higher ability for SRH to summarize global health risk among diabetes patients than  
44 specifically metabolic risk in a general population. It is also possible that SRH is more  
45 susceptible to "reporting behaviour" (i.e. how optimistic or pessimistic people are about  
46 their health) <sup>34</sup> in a generally healthier population compared to subjective health ratings  
47 later on in the disease process.  
48  
49  
50  
51  
52  
53  
54  
55  
56  
57  
58  
59  
60

1  
2  
3 Previous findings suggest that there may be sex differences in the SRH-mortality  
4 association<sup>35</sup> but we found no sex difference in the association between SRH and T2DM.  
5 SRH may also vary across countries<sup>36</sup>. In the present study, it is likely that the  
6 differences in SRH across centres to some extent can be explained by different sampling  
7 strategies and age distributions at different centres. We did not find support for  
8 heterogeneity in the association between SRH and T2DM across centres in this study.  
9 However, the study was restricted to countries in northern Europe. It is therefore not  
10 clear how these findings are generalisable to other populations. Moreover, in Heidelberg  
11 and Potsdam, the SRH question was assessed in terms of satisfaction with health and in  
12 the other centres in terms of perception of health, which may have had an influence on  
13 the distribution of responses. There were also some differences in response alternatives  
14 between centres. To some extent these differences were handled by standardization but  
15 the differences in the construct of the SRH question between centres are limitations to  
16 this study, particularly to the analysis of heterogeneity.  
17  
18  
19  
20  
21  
22  
23  
24  
25  
26  
27  
28  
29  
30

31 Strengths of the present study include the thorough ascertainment and verification of  
32 T2DM cases. Moreover, cultural differences may also have an impact on SRH, even within  
33 Europe and we included populations from four different European countries<sup>37</sup>. Several  
34 limitations of the study have already been listed, such as different construct of the SRH  
35 question and the restriction to countries in northern Europe. We would also like to point  
36 out that it is possible that participants reporting low SRH at baseline were more likely to  
37 seek medical advice during follow-up and hence were more likely to be tested for  
38 diabetes (detection bias). If this was the case, the study may have overestimated the  
39 risk of T2DM associated with low SRH.  
40  
41  
42  
43  
44  
45  
46  
47  
48

49 In our study, part of the SRH-T2DM association seemed to be explained by medical  
50 history as well as lifestyle variables. SRH may therefore be considered as a summary  
51 health measure – also for metabolic health. If there is access to several of the  
52 established risk factors for diabetes, SRH is not likely to add more than marginally to  
53 risk prediction on top of the conventional risk factors. However, whether SRH adds  
54  
55  
56  
57  
58  
59  
60

1  
2  
3 predictive value over and above established risk factors needs to be further analysed  
4 using adequate methods<sup>38</sup>.  
5  
6

7  
8 In conclusion, results from this prospective case-cohort study provide some evidence  
9 that low self-rated health is associated with a higher risk of type 2 diabetes mellitus. The  
10 association could be only partly explained by other health-related variables, of which  
11 obesity was the strongest.  
12  
13  
14

### 15 16 17 18 19 **Acknowledgments**

20  
21 We thank all EPIC participants and staff for their contribution to the study. We thank  
22 Nicola Kerrison (MRC Epidemiology Unit, Cambridge) for managing the data for the  
23 InterAct Project.  
24  
25  
26  
27

### 28 29 30 **Footnotes**

31  
32 *Contributors:* PW had access to all data for this study, analysed the data, drafted the  
33 manuscript and is the guarantor. All authors qualify for authorship according to BMJ Open  
34 criteria. They have all contributed to conception and design, and interpretation of data,  
35 revising the article critically for important intellectual content and final approval of the  
36 version to be published.  
37  
38  
39

40  
41  
42 *Competing interests:* All authors have completed the Unified Competing Interest form at  
43 [www.icmje.org/coi\\_disclosure.pdf](http://www.icmje.org/coi_disclosure.pdf) (available on request from the corresponding author)  
44 and declare: no support from any organisation for the submitted work; no financial  
45 relationships with any organisation that might have an interest in the submitted work in  
46 the previous three years; no other relationships or activities that could appear to have  
47 influenced the submitted work.  
48  
49  
50

51  
52  
53  
54  
55 *Funding:* Funding for the InterAct project was provided by the EU FP6 programme [grant  
56 number Integrated Project LSHM\_CT\_2006\_037197]. The funder had no role in study  
57  
58  
59



**Table 1** Overview of the five centres included in the study from the EPIC-InterAct study.

| Centre     | Description of source population                                                             | Baseline collection |           |                                                      |
|------------|----------------------------------------------------------------------------------------------|---------------------|-----------|------------------------------------------------------|
|            |                                                                                              | <i>n</i>            | Women (%) | 5 <sup>th</sup> and 95 <sup>th</sup> age percentiles |
| Bilthoven  | Participants were invited as age- and sex-stratified random sample of the general population | 22,715              | 55        | 23–58                                                |
| Cambridge  | Volunteers were invited as a random sample of the population listed at general practitioners | 30,441              | 55        | 45–74                                                |
| Heidelberg | Volunteers were invited from the general population                                          | 25,540              | 53        | 37–63                                                |
| Potsdam    | Volunteers were invited from the general population                                          | 27,548              | 60        | 36–64                                                |
| Umeå       | Participants were invited as a random sample of the population                               | 25,728              | 52        | 30–60                                                |

design, data collection and analysis, decision to publish, or preparation of the manuscript. In addition, InterAct investigators acknowledge funding from the following agencies: DLvdA and AMWS: Dutch Ministry of Public Health, Welfare and Sports (VWS), Netherlands Cancer Registry (NKR), LK Research Funds, Dutch Prevention Funds, Dutch ZON (Zorg Onderzoek Nederland), World Cancer Research Fund (WCRF), Statistics Netherlands (The Netherlands); RK: Deutsche Krebshilfe.

*Ethical approval:* The study was approved by the IARC Institutional Review Board and by the local review boards of the participating centers.

*Data sharing:* No additional data available.

1  
2  
3  
4  
5  
6  
7  
8  
9  
10  
11  
12  
13  
14  
15  
16  
17  
18  
19  
20  
21  
22  
23  
24  
25  
26  
27  
28  
29  
30  
31  
32  
33  
34  
35  
36  
37  
38  
39  
40  
41  
42  
43  
44  
45  
46  
47  
48  
49  
50  
51  
52  
53  
54  
55  
56  
57  
58  
59  
60

For peer review only

**Table 2** Self-rated health by centre in 3,399 incident cases of type 2 diabetes mellitus and 4,619 participants in the subcohort in the EPIC-InterAct study. Data shown are numbers of individuals (percentage).

| Centre     |           | Self-rated health |            |            |          |
|------------|-----------|-------------------|------------|------------|----------|
|            |           | <i>High</i>       |            | <i>Low</i> |          |
|            |           | Excellent         | Good       | Moderate   | Poor     |
| Bilthoven  | Cases     | 13 (4.3)          | 184 (61.5) | 73 (24.4)  | 29 (9.7) |
|            | Subcohort | 52 (9.0)          | 403 (70.0) | 101 (17.5) | 21 (3.6) |
| Cambridge  | Cases     | 92 (12.3)         | 428 (57.1) | 206 (27.5) | 24 (3.2) |
|            | Subcohort | 159 (16.2)        | 624 (63.4) | 170 (17.4) | 23 (2.3) |
| Heidelberg | Cases     | 173 (23.1)        | 395 (52.8) | 156 (20.9) | 24 (3.2) |
|            | Subcohort | 286 (32.9)        | 448 (51.5) | 125 (14.4) | 11 (1.3) |
| Potsdam    | Cases     | 118 (15.2)        | 460 (59.4) | 171 (22.1) | 26 (3.4) |
|            | Subcohort | 274 (23.1)        | 721 (60.9) | 164 (13.9) | 25 (2.1) |
| Umeå       | Cases     | 155 (18.7)        | 369 (44.6) | 236 (28.5) | 67 (8.1) |
|            | Subcohort | 265 (26.2)        | 477 (47.1) | 215 (21.2) | 55 (5.4) |

**Table 3** Baseline characteristics of subcohort individuals in the EPIC-InterAct study by categories of self-rated health. Data are presented as mean and standard deviations (SD) for continuous variables and percentages and frequencies for categorical variables.

|                                         | Self-rated health |       |        |       |          |       |        |       | <i>p</i> -value for overall difference* |
|-----------------------------------------|-------------------|-------|--------|-------|----------|-------|--------|-------|-----------------------------------------|
|                                         | High              |       |        |       | Low      |       |        |       |                                         |
|                                         | Excellent         |       | Good   |       | Moderate |       | Poor   |       |                                         |
|                                         | Mean/%            | SD/N  | Mean/% | SD/N  | Mean/%   | SD/N  | Mean/% | SD/N  |                                         |
| Age (years)                             | 48.8              | 10.3  | 50.5   | 11.1  | 51.7     | 10.9  | 50.3   | 10.2  | <0.001                                  |
| Sex (% men)                             | 42.8              | 443   | 45.2   | 1208  | 44.8     | 347   | 37.8   | 51    | 0.24                                    |
| Educational level (%)                   |                   |       |        |       |          |       |        |       | <0.001                                  |
| <i>Primary school or none</i>           | 19.2              | 194   | 24.4   | 635   | 37.9     | 287   | 30.8   | 40    |                                         |
| <i>Technical/professional school</i>    | 34.6              | 351   | 35.0   | 910   | 29.6     | 224   | 32.3   | 42    |                                         |
| <i>Secondary school</i>                 | 14.9              | 151   | 14.2   | 369   | 14.4     | 109   | 18.5   | 24    |                                         |
| <i>Higher (incl. university degree)</i> | 31.3              | 317   | 26.4   | 688   | 18.1     | 137   | 18.5   | 24    |                                         |
| BMI (kg/m <sup>2</sup> )                | 24.8              | 3.4   | 25.5   | 4.0   | 26.2     | 4.5   | 25.6   | 5.4   | <0.001                                  |
| Smoking status (%)                      |                   |       |        |       |          |       |        |       | <0.001                                  |
| <i>Never</i>                            | 52.1              | 540   | 46.6   | 1246  | 41.7     | 323   | 40.7   | 55    |                                         |
| <i>Former</i>                           | 27.5              | 285   | 30.1   | 804   | 30.1     | 233   | 23.7   | 32    |                                         |
| <i>Current</i>                          | 18.8              | 195   | 21.0   | 561   | 26.1     | 202   | 32.6   | 44    |                                         |
| <i>Unknown</i>                          | 1.5               | 16    | 2.3    | 62    | 2.2      | 17    | 3.0    | 4     |                                         |
| Physical activity (%)                   |                   |       |        |       |          |       |        |       | <0.001                                  |
| <i>Inactive</i>                         | 15.9              | 160   | 21.3   | 548   | 31.1     | 231   | 43.3   | 52    |                                         |
| <i>Moderately inactive</i>              | 33.2              | 335   | 31.7   | 818   | 28.8     | 214   | 29.2   | 35    |                                         |
| <i>Moderately active</i>                | 25.5              | 257   | 26.8   | 689   | 21.8     | 162   | 15.0   | 18    |                                         |
| <i>Active</i>                           | 25.5              | 257   | 20.2   | 521   | 18.2     | 135   | 12.5   | 15    |                                         |
| Alcohol consumption (g/d)               | 11.5              | 16.2  | 10.8   | 15.2  | 9.2      | 15.4  | 5.6    | 9.8   | <0.001                                  |
| Total energy intake (kcal)              | 2016.6            | 649.7 | 2056.7 | 618.3 | 2009.4   | 617.3 | 1928.3 | 617.9 | 0.007                                   |
| Hypertension (%)                        | 16.0              | 165   | 22.8   | 600   | 32.7     | 245   | 33.3   | 44    | <0.001                                  |
| History of myocardial infarction (%)    | 0.4               | 4     | 1.5    | 40    | 3.6      | 28    | 3.7    | 5     | <0.001                                  |

\*Comparing excellent, good, moderate, and poor self-rated health

**Table 4** Pooled hazard ratios of incident T2DM comparing low (moderate or poor) versus high (excellent or good) self-rated health.

|                                   | High self-rated health | Low self-rated health |
|-----------------------------------|------------------------|-----------------------|
|                                   | Pooled HR (95% CI)     | Pooled HR (95% CI)*   |
| Model 1: Adjusted for age and sex | 1.00 (referent)        | 1.67 (1.48 to 1.88)   |
| Model 1 + education               | 1.00 (referent)        | 1.60 (1.42 to 1.81)   |
| Model 1 + BMI                     | 1.00 (referent)        | 1.38 (1.19 to 1.60)   |
| Model 1 + smoking                 | 1.00 (referent)        | 1.67 (1.48 to 1.89)   |
| Model 1 + physical activity       | 1.00 (referent)        | 1.59 (1.41 to 1.80)   |
| Model 1 + alcohol consumption     | 1.00 (referent)        | 1.67 (1.48 to 1.89)   |
| Model 1 + energy intake           | 1.00 (referent)        | 1.67 (1.48 to 1.88)   |
| Model 1 + hypertension            | 1.00 (referent)        | 1.48 (1.31 to 1.69)   |
| Model 1 + all covariates above    | 1.00 (referent)        | 1.29 (1.09 to 1.53)   |

\*Pooled hazard ratios calculated using a centre-stratified approach in combination with a random effects meta-analysis.

## FIGURE LEGENDS

**Figure 1** Overview of the five centres included in the study from the EPIC-InterAct study.

**Figure 2** Centre-specific and pooled hazard ratios of incident T2DM adjusted for the variables in the final model (age, sex, education, BMI, smoking, physical activity, alcohol consumption, energy intake and hypertension).

## References

1. Danaei G, Finucane MM, Lu Y, et al. National, regional, and global trends in fasting plasma glucose and diabetes prevalence since 1980: systematic analysis of health examination surveys and epidemiological studies with 370 country-years and 2.7 million participants. *Lancet* 2011;378(9785):31-40.
2. Shaw JE, Sicree RA, Zimmet PZ. Global estimates of the prevalence of diabetes for 2010 and 2030. *Diabetes Res Clin Pract* 2010;87(1):4-14.
3. Idler EL, Benyamini Y. Self-rated health and mortality: a review of twenty-seven community studies. *J. Health Soc. Behav.* 1997;38(1):21-37.
4. Benyamini Y. Why does self-rated health predict mortality? An update on current knowledge and a research agenda for psychologists. *Psychol Health* 2011;26(11):1407-13.
5. Halford C, Anderzen I, Arnetz B. Endocrine measures of stress and self-rated health: a longitudinal study. *J Psychosom Res* 2003;55(4):317-20.
6. DeSalvo KB, Bloser N, Reynolds K, et al. Mortality prediction with a single general self-rated health question. A meta-analysis. *J Gen Intern Med* 2006;21(3):267-75.
7. Mavaddat N, Kinmonth AL, Sanderson S, et al. What determines Self-Rated Health (SRH)? A cross-sectional study of SF-36 health domains in the EPIC-Norfolk cohort. *J Epidemiol Community Health* 2011;65(9):800-6.
8. DeSalvo KB, Jones TM, Peabody J, et al. Health care expenditure prediction with a single item, self-rated health measure. *Med Care* 2009;47(4):440-7.
9. Ramkumar A, Quah JL, Wong T, et al. Self-rated health, associated factors and diseases: a community-based cross-sectional study of Singaporean adults aged 40 years and above. *Ann. Acad. Med. Singapore* 2009;38(7):606-7.
10. Shadbolt B. Some correlates of self-rated health for Australian women. *Am J Public Health* 1997;87(6):951-6.
11. Manor O, Matthews S, Power C. Self-rated health and limiting longstanding illness: inter-relationships with morbidity in early adulthood. *Int J Epidemiol* 2001;30(3):600-7.
12. Leosdottir M, Willenheimer R, Persson M, et al. The association between glucometabolic disturbances, traditional cardiovascular risk factors and self-rated health by age and gender: a cross-sectional analysis within the Malmo Preventive Project. *Cardiovasc Diabetol* 2011;10:118.
13. Tapp RJ, O'Neil A, Shaw JE, et al. Is there a link between components of health-related functioning and incident impaired glucose metabolism and type 2 diabetes? The Australian Diabetes Obesity and Lifestyle (AusDiab) study. *Diabetes Care* 2010;33(4):757-62.
14. Latham K, Peek CW. Self-rated health and morbidity onset among late midlife u.s. Adults. *J. Gerontol. B. Psychol. Sci. Soc. Sci.* 2013;68(1):107-16.
15. Riboli E, Hunt KJ, Slimani N, et al. European Prospective Investigation into Cancer and Nutrition (EPIC): study populations and data collection. *Public Health Nutr* 2002;5(6B):1113-24.

- 1
  - 2
  - 3
  - 4
  - 5
  - 6
  - 7
  - 8
  - 9
  - 10
  - 11
  - 12
  - 13
  - 14
  - 15
  - 16
  - 17
  - 18
  - 19
  - 20
  - 21
  - 22
  - 23
  - 24
  - 25
  - 26
  - 27
  - 28
  - 29
  - 30
  - 31
  - 32
  - 33
  - 34
  - 35
  - 36
  - 37
  - 38
  - 39
  - 40
  - 41
  - 42
  - 43
  - 44
  - 45
  - 46
  - 47
  - 48
  - 49
  - 50
  - 51
  - 52
  - 53
  - 54
  - 55
  - 56
  - 57
  - 58
  - 59
  - 60
16. Langenberg C, Sharp S, Forouhi NG, et al. Design and cohort description of the InterAct Project: an examination of the interaction of genetic and lifestyle factors on the incidence of type 2 diabetes in the EPIC Study. *Diabetologia* 2011;54(9):2272-82.
17. Walker JD, Maxwell CJ, Hogan DB, et al. Does self-rated health predict survival in older persons with cognitive impairment? *J. Am. Geriatr. Soc.* 2004;52(11):1895-900.
18. McEwen LN, Kim C, Haan MN, et al. Are health-related quality-of-life and self-rated health associated with mortality? Insights from Translating Research Into Action for Diabetes (TRIAD). *Prim Care Diabetes* 2009;3(1):37-42.
19. Lee SJ, Moody-Ayers SY, Landefeld CS, et al. The relationship between self-rated health and mortality in older black and white Americans. *J. Am. Geriatr. Soc.* 2007;55(10):1624-9.
20. Pischon T, Boeing H, Hoffmann K, et al. General and abdominal adiposity and risk of death in Europe. *N Engl J Med* 2008;359(20):2105-20.
21. Validity of a short questionnaire to assess physical activity in 10 European countries. *Eur J Epidemiol* 2012;27(1):15-25.
22. Barlow WE, Ichikawa L, Rosner D, et al. Analysis of case-cohort designs. *J Clin Epidemiol* 1999;52(12):1165-72.
23. Singh-Manoux A, Martikainen P, Ferrie J, et al. What does self rated health measure? Results from the British Whitehall II and French Gazel cohort studies. *J. Epidemiol. Community Health* 2006;60(4):364-72.
24. Kenward MG, Carpenter J. Multiple imputation: current perspectives. *Stat. Methods Med. Res.* 2007;16(3):199-218.
25. Benjamins MR, Hummer RA, Eberstein IW, et al. Self-reported health and adult mortality risk: an analysis of cause-specific mortality. *Soc Sci Med* 2004;59(6):1297-306.
26. Wennberg P, Rolandsson O, Jerden L, et al. Self-rated health and mortality in individuals with diabetes mellitus: prospective cohort study. *BMJ Open* 2012;2(1):e000760.
27. Dasbach EJ, Klein R, Klein BE, et al. Self-rated health and mortality in people with diabetes. *Am J Public Health* 1994;84(11):1775-9.
28. Prosper MH, Moczulski VL, Qureshi A. Obesity as a predictor of self-rated health. *Am J Health Behav* 2009;33(3):319-29.
29. Haffner SM. Relationship of metabolic risk factors and development of cardiovascular disease and diabetes. *Obesity (Silver Spring)* 2006;14 Suppl 3:121S-27S.
30. Krause NM, Jay GM. What do global self-rated health items measure? *Med Care* 1994;32(9):930-42.
31. Bailis DS, Segall A, Chipperfield JG. Two views of self-rated general health status. *Soc. Sci. Med.* 2003;56(2):203-17.
32. Gregg EW, Gu Q, Cheng YJ, et al. Mortality trends in men and women with diabetes, 1971 to 2000. *Ann. Intern. Med.* 2007;147(3):149-55.
33. Vigneri P, Frasca F, Sciacca L, et al. Diabetes and cancer. *Endocr Relat Cancer* 2009;16(4):1103-23.
34. Layes A, Asada Y, Keparat G. Whiners and deniers - What does self-rated health measure? *Soc. Sci. Med.* 2011.
35. Benyamini Y, Blumstein T, Lusky A, et al. Gender differences in the self-rated health-mortality association: is it poor self-rated health that predicts mortality or excellent self-rated health that predicts survival? *Gerontologist* 2003;43(3):396-405; discussion 372-5.
36. Vadla D, Bozikov J, Akerstrom B, et al. Differences in healthcare service utilisation in elderly, registered in eight districts of five European countries. *Scand J Public Health* 2011;39(3):272-9.
37. Jylha M, Guralnik JM, Ferrucci L, et al. Is self-rated health comparable across cultures and genders? *J. Gerontol. B. Psychol. Sci. Soc. Sci.* 1998;53(3):S144-52.
38. Pencina MJ, D'Agostino RB, Sr., D'Agostino RB, et al. Evaluating the added predictive ability of a new marker: from area under the ROC curve to reclassification and beyond. *Stat. Med.* 2008;27(2):157-72; discussion 207-12.

1  
2  
3  
4  
5  
6  
7  
8  
9  
10  
11  
12  
13  
14  
15  
16  
17  
18  
19  
20  
21  
22  
23  
24  
25  
26  
27  
28  
29  
30  
31  
32  
33  
34  
35  
36  
37  
38  
39  
40  
41  
42  
43  
44  
45  
46  
47  
48  
49  
50  
51  
52  
53  
54  
55  
56  
57  
58  
59  
60

For peer review only



1  
2  
3  
4  
5  
6  
7 **Self-rated Health and Type 2 Diabetes Risk in the EPIC-InterAct Study: a**  
8 **case-cohort study**  
9

10  
11 P. Wennberg 1; O. Rolandsson 1; D.L. van der A 2; A.W. Spijkerman 2; R. Kaaks 3; H.  
12 Boeing 4; S. Feller 4; M.M. Bergmann 4; C. Langenberg 5; S.J. Sharp 5; N. Forouhi 5; E.  
13 Riboli 6; N. Wareham 5

14  
15  
16 1. Department of Public Health and Clinical Medicine, Umeå University, Umeå, Sweden;  
17  
18 2. National Institute for Public Health and the Environment, Centre for Prevention and  
19 Health Services Research, Bilthoven, The Netherlands; 3. Division of Cancer  
20 Epidemiology, German Cancer Research Center, Heidelberg, Germany; 4. Department of  
21 Epidemiology, German Institute of Human Nutrition Potsdam-Rehbrücke, Nuthetal,  
22 Germany; 5. MRC Epidemiology Unit, Institute of Metabolic Science, Addenbrooke's  
23 Hospital, Cambridge, United Kingdom; 6. Department of Epidemiology & Biostatistics,  
24 School of Public Health, Imperial College London, London, United Kingdom.  
25  
26  
27  
28  
29  
30  
31

32 Correspondence: P. Wennberg

33  
34 Address: Portstigen 24, 931 51 Skellefteå, Sweden

35  
36 Fax: +46 90 776883, Telephone: +46 90 7851423

37  
38  
39 E-mail: patrik.wennberg@fammed.umu.se

40  
41 Key words: Type 2 diabetes, self-rated health, prevention, case-cohort

42  
43 Word count (main text): 3533426

44  
45 Word count (abstract): 26047  
46  
47  
48  
49  
50  
51  
52  
53  
54  
55  
56  
57  
58  
59  
60

1  
2  
3  
4  
5  
6  
7 The Corresponding Author has the right to grant on behalf of all authors and does grant  
8 on behalf of all authors, an exclusive licence (or non-exclusive for government  
9 employees) on a worldwide basis to the BMJ Publishing Group Ltd and its Licensees to  
10 permit this article (if accepted) to be published in BMJ Open and any other BMJPG  
11 products to exploit all subsidiary rights, as set out in our licence (  
12 [http://group.bmj.com/products/journals/instructions-for-](http://group.bmj.com/products/journals/instructions-for-authors/wholly_owned_licence.pdf)  
13 [authors/wholly\\_owned\\_licence.pdf](http://group.bmj.com/products/journals/instructions-for-authors/wholly_owned_licence.pdf)) and the Corresponding Author accepts and  
14 understands that any supply made under these terms is made by BMJPG  
15 Corresponding Author.  
16  
17  
18  
19  
20  
21  
22  
23  
24  
25  
26  
27  
28  
29  
30  
31  
32  
33  
34  
35  
36  
37  
38  
39  
40  
41  
42  
43  
44  
45  
46  
47  
48  
49  
50  
51  
52  
53  
54  
55  
56  
57  
58  
59  
60

**Abstract**

**Objectives** To investigate the association between self-rated health and risk of type 2 diabetes and -whether the strength of this association is consistent across five European centres.

**Design** Population-based prospective case-cohort study.

**Setting** Enrolment took place between 1992 and 2000 in five European centres (Bilthoven, Cambridge, Heidelberg, Potsdam, Umeå).

**Participants** Self-rated health was assessed by baseline questionnaire in 3,399 incident type 2 diabetic case participants and a centre-stratified subcohort of 4,619 individuals from the EPIC-InterAct study which was drawn from a total cohort of 340,234 participants in the European Prospective Investigation into Cancer and Nutrition (EPIC).

**Primary outcome measure** Prentice-weighted Cox regression was used to estimate centre-specific hazard ratios (HRs) and 95% confidence intervals (CIs) for incident type 2 diabetes controlling for age, sex, centre, education, BMI, smoking, alcohol consumption, energy intake, physical activity, and hypertension. The centre-specific HRs were pooled across centres by random effects meta-analysis.

**Results** Low self-rated health was associated with a higher hazard of type 2 diabetes after adjusting for age and sex (pooled HR 1.67, 95% CI 1.48 to 1.88). After additional adjustment for health-related variables including BMI, the association was attenuated but remained statistically significant (pooled HR 1.29, 95% CI 1.09 to 1.53).  $I^2$  index for heterogeneity across centres was 13.3% ( $p=0.33$ ).

**Conclusions** Low self-rated health was associated with a higher risk of type 2 diabetes. The association could be only partly explained by other health-related variables, of which obesity was the strongest. We found no indication of heterogeneity in the association between self-rated health and type 2 diabetes mellitus across the European centres.

## Article Summary

### Article focus

- Self-rated health has been widely used as a global health measure. Several cross-sectional studies have suggested an association between low self-rated health and type 2 diabetes mellitus.
- We aimed to prospectively investigate the association between self-rated health and risk of type 2 diabetes and whether the strength of this association is consistent across five European centres. A population-based case-cohort study design was used ~~and five European centers were included~~ in the study.

### Key messages

- Results from this study provide some evidence that low self-rated health is associated with a higher risk of type 2 diabetes mellitus. The association could be only partly explained by other health-related variables, of which obesity was the strongest.
- We found no indication of heterogeneity in the association between self-rated health and type 2 diabetes mellitus across centres.

### Strength and limitations

- The study used a thorough ascertainment and verification of type 2 diabetes mellitus cases and included populations from four different European countries.
- The assessment of self-rated health differed somewhat between centres regarding the construct (formulation, response alternatives and time frames) ~~offer~~ the self-rated health question.

## Introduction

The prevalence of type 2 diabetes mellitus (T2DM) worldwide has more than doubled since 1980.<sup>1</sup> In 2010, it was estimated that over 250 million people suffered from T2DM.<sup>2</sup> Several risk factors have been identified (e.g. age, BMI, family history and physical inactivity) but the aetiology of T2DM is complex and still largely unknown. Self-rated health (SRH) is a subjective measure of health usually defined by responses to a single question such as "How do you rate your health?". SRH is suggested to capture physical, psychological and social aspects that may be difficult to assess by objective health measurements<sup>3</sup>. Furthermore, SRH has been associated with "bodily sensations and symptoms that can reflect disease in clinical or pre-clinical stages".<sup>4-5</sup> Individuals with poor ~~self-rated health (SRH)~~ tend to have higher mortality,<sup>3 6</sup> poorer physical activity<sup>7</sup> and higher health care utilization<sup>8</sup> than individuals rating their health as excellent or good. It is likely that individuals with poor SRH face larger or different barriers to adopt a healthy lifestyle, which may be of relevance to how prevention efforts should be targeted. Several cross-sectional studies in different populations have reported associations between poor SRH and prevalent diabetes<sup>9-11</sup> or glucometabolic disturbance.<sup>12</sup> The primary aim of this study was to investigate the association between SRH and risk of T2DM. As a secondary aim, we investigated whether the strength of this association was consistent across five European centres. A few ~~To our knowledge, only one~~ previous prospective studies ~~have evaluated~~ ~~on~~ the association between SRH and incidence of T2DM ~~has been published.~~ A study by Tapp et al.<sup>13</sup> showed that poorer ~~reduced~~ SRH is associated with newly diagnosed T2DM after a five year follow-up.<sup>13</sup> , but the ~~However, this prospective~~ study was limited by high loss to follow-up. In a recent study, Latham and Peek found that SRH was a significant predictor for six major chronic diseases, including diabetes, among late midlife U.S. adults.<sup>14</sup> However, the outcome assessment in the study was based on self-reports, which makes the measurement susceptible for misclassification. The EPIC-InterAct Study is a large case-cohort study with thorough ascertainment and verification of T2DM that provides an ideal

Field Code Changed

Field Code Changed

Field Code Changed

Field Code Changed

Formatted: Do not check spelling or grammar, Superscript

Formatted: Do not check spelling or grammar, Superscript

1  
2  
3  
4  
5  
6  
7 setting to investigate the association between SRH and T2DM across several European  
8 countries.  
9

## 10 11 12 13 **Methods**

### 14 *Study population*

15  
16  
17 The InterAct Project was initiated to investigate how genetic and lifestyle behavioural  
18 factors, particularly diet and physical activity, interact on the risk of developing diabetes  
19 and how knowledge about such interactions may be translated into preventive action.  
20

21  
22 The EPIC-InterAct case-cohort study was nested in the European Prospective  
23 Investigation into Cancer and Nutrition (EPIC), which in total consists of 519,978 men  
24 and women across Europe.<sup>1514</sup> Out of these, 340,234 participants were eligible for the  
25

Field Code Changed

26  
27 EPIC-InterAct study, which includes centres from eight different European countries  
28 (Denmark, France, Germany, Italy, the Netherlands, Spain, Sweden and the United  
29 Kingdom). A detailed description of the study design and methods can be found  
30 elsewhere.<sup>1615</sup> In the present analysis we only included centres that had baseline data  
31

Field Code Changed

32  
33 available on self-rated health (Germany: Heidelberg and Potsdam; the U.K.: Cambridge;  
34 the Netherlands: Bilthoven; Sweden: Umeå). Participants were ~~25 to 70 years old at~~  
35  
36  
37 ~~enrollment~~ between 1992 and 2000. ~~An overview of the five centres is presented in~~  
38  
39 ~~Table 1.~~ Among the participants from the five centres included in this study, ~~3,399~~  
40  
41 ~~incident T2DM cases~~ ~~3,412 incident T2DM cases were identified~~ and a subcohort of  
42  
43 ~~4,619,637~~ individuals ~~remained~~ ~~were randomly selected~~ after exclusions ~~for prevalent~~  
44  
45 ~~diabetes or unknown diabetes status. Data on self-rated health was available for 4,619~~  
46  
47 ~~individuals in the subcohort and 3,399 incident T2DM cases~~ **(Figure 1)**. Due to the  
48  
49 random nature of the case-cohort design applied in the present study, the subcohort also  
50  
51 included 140 individuals who developed T2DM during follow-up. All participants gave  
52  
53 written consent and the study was approved by the ethical review board of the  
54  
55 International Agency for Research on Cancer and by the local review boards of the  
56  
57 participating centres.  
58  
59  
60

1  
2  
3  
4  
5  
6  
7  
8  
9  
10  
11  
12  
13  
14  
15  
16  
17  
18  
19  
20  
21  
22  
23  
24  
25  
26  
27  
28  
29  
30  
31  
32  
33  
34  
35  
36  
37  
38  
39  
40  
41  
42  
43  
44  
45  
46  
47  
48  
49  
50  
51  
52  
53  
54  
55  
56  
57  
58  
59  
60

### Ascertainment of T2DM cases

Incident cases of T2DM until 31 December 2007 were ascertained and verified at each EPIC centre participating in the Epic-InterAct project using follow-up questionnaires (T2DM diagnosed by a medical doctor or anti-diabetic drug use), linkage to primary and secondary care registers, medication use (prescription registers), hospital admission and mortality data, and individual medical-record review at some centres. To increase the specificity of the case definition and to avoid inclusion in the study based on self-report of T2DM alone, further evidence was sought for all incident cases of T2DM. T2DM cases were included in the study only if confirmation of the diagnosis was secured from no less than two independent sources. Cases in Umeå, Sweden were not ascertained by self-report, but identified via local and national diabetes and pharmaceutical registers and hence all ascertained cases were considered to be verified.<sup>16+5</sup> ~~To increase the specificity of the case definition and to avoid inclusion in the study based on self-report of T2DM alone, further evidence was sought for all incident cases of T2DM. T2DM cases were included in the study only if confirmation of the diagnosis was secured from no less than two independent sources, including individual medical record review.~~

Field Code Changed

### Assessment of self-rated health

SRH was assessed at baseline using self-administered questionnaires in the native language. The questionnaires were somewhat differently formulated at each centre and were therefore standardized (described in **Appendix**). Given the low frequency of responses in the extreme categories (n=305 in the lowest category) we dichotomized the SRH variable in the analysis by combining the two highest categories (high SRH) and the two lowest categories (low SRH) in order to increase statistical power. This is also in conformity with previous research.<sup>17-19+6-18</sup>

Field Code Changed

### Assessment of covariates

1  
2  
3  
4  
5  
6  
7 Weight and height were measured with participants not wearing shoes. Each participant's  
8 body weight was corrected for clothing worn during measurement in order to reduce  
9 heterogeneity due to protocol differences among centres.<sup>2019</sup> Body mass index (BMI) was  
10 calculated, as weight (kilograms) divided by height (metres) squared. Hypertension was  
11 defined as self-reported medical history of hypertension or hypertension (based on  
12 measurements or drug use) at baseline. Further health-related variables were collected  
13 using questionnaires including questions on educational level, smoking status (current  
14 smoker versus non-smoker or ex-smoker), diet, physical activity level, alcohol  
15 consumption, and previous myocardial infarction. Physical activity (PA) was assessed  
16 using the Cambridge index, a validated ordered categorical global index of activity  
17 derived from simple questions assessing recreational and occupational activity.<sup>2120</sup>  
18  
19  
20  
21  
22  
23  
24  
25  
26

#### 27 *Statistical analysis*

28 The association between SRH and various baseline characteristics within the subcohort  
29 was tested using a chi-square test (for categorical variables) and a Kruskal-Wallis test  
30 (for continuous variables). Cox proportional hazards regression, modified for the case-  
31 cohort design according to the Prentice method,<sup>2221</sup> was used to estimate centre-specific  
32 hazard ratios (HRs) and 95% confidence intervals (CI) for the association between SRH  
33 and T2DM. Age was used as the primary time variable, with entry time defined as the  
34 participant's age in years at recruitment and exit time as the participant's age in years at  
35 date of diagnosis, death or censoring. The centre-specific HRs were then pooled across  
36 centres by random effects meta-analysis.  
37  
38  
39  
40  
41  
42  
43

44 It is not clear whether SRH mechanistically operates as an indicator of some unmeasured  
45 process or as a summary of a large number of other measures.<sup>3, 233-22</sup> Therefore, a large  
46 set of covariates were considered as potential confounders and included in models to  
47 determine pooled HRs at different levels of adjustment. All models were adjusted for age  
48 and sex. Each model was then further adjusted for the other health-related variables,  
49 one at a time and finally, all potential confounders in the same model. Education level,  
50  
51  
52  
53  
54  
55  
56  
57  
58  
59  
60

Field Code Changed



1  
2  
3  
4  
5  
6  
7  
8  
9  
10  
11  
12  
13  
14  
15  
16  
17  
18  
19  
20  
21  
22  
23  
24  
25  
26  
27  
28  
29  
30  
31  
32  
33  
34  
35  
36  
37  
38  
39  
40  
41  
42  
43  
44  
45  
46  
47  
48  
49  
50  
51  
52  
53  
54  
55  
56  
57  
58  
59  
60

smoking status, physical activity and hypertension were included as categorical variables, whereas BMI, alcohol consumption and energy intake were included as continuous variables.  $I^2$  – the percentage of variation between centres due to heterogeneity – was calculated. A possible interaction between SRH and sex on T2DM incidence was tested by introducing an interaction term in the regression analysis. We conducted a sensitivity analysis by excluding participants who were diagnosed with T2DM within two years of follow-up. In a second sensitivity analysis we excluded all participants with history of myocardial infarction at baseline. To investigate the impact of excluding 323 T2DM cases and 405 members of the subcohort with missing data on covariates, a third sensitivity analysis was conducted by multiple imputation of missing data considered missing at random (based on 5, 10 and 50 imputations) in cases and non-cases. For each variable with missing data, a predictive model was created among participants with no missing data; that model was then used to predict values for participants who were missing those data.<sup>2423</sup> All analyses were performed using Stata 11.2, except for the random effects meta-analysis which was performed using Comprehensive Meta-Analysis version 2.

Field Code Changed

## Results

The mean follow-up time was 9.1 years ( $\pm$  3.8). SRH by centre in incident cases of T2DM and subcohort individuals is presented in **Table 21**. **Table 32** shows the baseline characteristics of individuals in the subcohort by categories of SRH. Participants with low SRH were younger, had lower educational level and a higher BMI than participants with high SRH. Moreover, participants with low SRH were more often smokers, less physically active, had lower alcohol consumption and estimated reported energy intake, and more frequently had hypertension and a history of myocardial infarction than persons with high SRH.

In a model with adjustment for age and centre, low SRH was associated with a higher hazard of T2DM (HR 1.67, 95% CI 1.48 to 1.88) (**Table 43**). We found no significant

1  
2  
3  
4  
5  
6  
7 interaction between SRH and sex on T2DM incidence ( $p=0.54$ ) and the analyses were  
8 therefore not stratified by sex. The strength of the association between SRH and T2DM  
9 was mainly unaffected by adjustment for smoking, alcohol consumption and estimated  
10 reported energy intake. Adjustment for other health-related variables, BMI in particular,  
11 led to attenuation of the association (adding BMI to the model attenuated the pooled HR  
12 to 1.38, 95% CI 1.19 to 1.60). In a final model with adjustment for age, sex, education,  
13 BMI, smoking, physical activity, alcohol consumption, estimated reported energy intake  
14 and hypertension, the association was attenuated but remained significant (HR 1.29,  
15 95% CI 1.09 to 1.53). The centre-specific HRs and the pooled HR based on the final  
16 model are presented in **Figure 2†**. We found no indication of heterogeneity in the  
17 association between SRH and T2DM across centres ( $I^2$  index 13.3%,  $p=0.33$ ).  
18  
19  
20  
21  
22  
23  
24  
25

26 In a first sensitivity analysis we excluded participants who were diagnosed with T2DM  
27 within two years of follow-up ( $n=398$ ). These exclusions had only minor effect on the  
28 pooled HR (1.29, 95% CI 1.08 to 1.55, adjusted for the variables in the final model). The  
29 number of participants with history of myocardial infarction was low ( $n=202$ ) and the  
30 multivariate model did not fit when this covariate was included. Thus, in the second  
31 sensitivity analysis we excluded all participants with a history of myocardial infarction at  
32 baseline. This did not change the conclusions (pooled HR 1.27, 95% CI 1.08 to 1.50,  
33 adjusted for the variables in the final model). Because of missing data on covariates, 323  
34 T2DM cases and 405 members of the subcohort were excluded from analyses. As a third  
35 sensitivity analysis, multiple imputations of these data, assuming missingness at random,  
36 were conducted. No significant differences in results were found in datasets based on 5,  
37 10 or 50 imputations, compared to the original dataset. Therefore, it seems unlikely that  
38 the results are biased due to missing data.  
39  
40  
41  
42  
43  
44  
45  
46  
47  
48

## 49 Discussion

50 In this prospective case-cohort study we found that low SRH was associated with a  
51 higher risk of T2DM. The association was partly explained by other health-related  
52  
53  
54  
55

1  
2  
3  
4  
5  
6  
7 variables, particularly BMI. A somewhat unexpected finding was that the association  
8 between SRH and T2DM was mainly unaffected by adjustment for smoking, alcohol  
9 consumption and estimated reported energy intake. We found no indication of  
10 heterogeneity in the association between SRH and T2DM across the European centres.  
11

12  
13  
14 SRH has been widely used as a global health measure. Previous studies on general  
15 populations have shown that there is a strong relationship between SRH and mortality,  
16 even after controlling for sociodemographic factors, objective measures of health status,  
17 and health behaviours <sup>6,256-24</sup>. A few studies have investigated the association between  
18 SRH and mortality in populations of diabetes patients with results similar to those of  
19 general populations <sup>18,26-27,17-25-26</sup>. SRH and prevalent diabetes have been associated in  
20 several cross-sectional studies <sup>9-12,289-12-27</sup>. However, cross-sectional studies are limited  
21 by their inability to study the temporal sequence of exposure and disease. Furthermore,  
22 these studies have not separated type 2 and type 1 diabetes.  
23  
24  
25  
26  
27  
28

29  
30 Any causality cannot be established by an observational study, but the findings in this  
31 prospective study imply that there is a dominant direction of this association from low  
32 SRH to T2DM (i.e. a temporal relationship). We have only found ~~two~~ previous  
33 prospective studies of the association between SRH and T2DM in a large general  
34 population. In the Australian Diabetes Obesity and Lifestyle study, Tapp et al. <sup>13</sup> found  
35 that participants with newly diagnosed diabetes had reported impaired general health  
36 before the onset of T2DM. The study was limited by a shorter follow-up (5 years) and  
37 they did not present any sensitivity analysis with exclusion of participants, who were  
38 diagnosed with T2DM shortly after baseline, which makes a bidirectional association  
39 more likely. ~~Furthermore, the study was limited by a low follow-up response rate.~~  
40 In our study, with a mean follow-up of over 9 years, the association between SRH and T2DM  
41 remained when we excluded participants who were diagnosed with T2DM within two  
42 years of follow-up. Recently, Latham and Peek published a report from the Health and  
43 Retirement Study, a longitudinal survey of a U.S. midlife cohort.<sup>14</sup> They found that SRH  
44 predicted diabetes as well as coronary heart disease, stroke, lung disease, and arthritis  
45  
46  
47  
48  
49  
50  
51  
52  
53  
54  
55

Field Code Changed

Field Code Changed

Formatted: Do not check spelling or grammar, Superscript

1  
2  
3  
4  
5  
6  
7 but not cancer. A weakness in the study was that the outcome measurement was based  
8 on self-reports. Our study supports this previous prospective research by showing an  
9 association between SRH and T2DM also when a strict verification procedure for outcome  
10 measurement is applied.

Formatted: English (U.S.), Not Expanded by /  
Condensed by

14 In the present study, low SRH was associated with a higher BMI which is in line with  
15 previous research. In a study investigating the relationship between self-rated health  
16 and obesity, Prosper et al. found that obese individuals had a 3-fold greater odds of  
17 reporting reduced health compared to individuals with normal weight or overweight. As  
18 obesity is also considered to be a major risk factor for diabetes <sup>2928</sup>, obesity is likely to  
19 explain a substantial part of the association between low SRH and T2DM. Thus, it is not  
20 surprising that BMI may act as an important confounder in the association between SRH  
21 and T2DM in this study -or as a mediator since SRH and obesity might be on the same  
22 causal pathway.

29  
30 More surprising was the fact that participants with low SRH had lower alcohol  
31 consumption and estimated reported energy intake. These findings are not easily  
32 explained and raise questions regarding the criteria for self-assessment. Previous  
33 research on occupational cohorts has suggested that SRH principally reflects physical  
34 and mental health problems and to a lesser extent age, early life factors, family history,  
35 sociodemographic variables, psychosocial factors, and health behaviours <sup>2322</sup>. One study  
36 that used in-depth interviews found that the same frame of reference is not used by all  
37 respondents in answering this question <sup>3029</sup>. Some study participants think about specific  
38 health problems when asked to rate their health, whereas others think in terms of either  
39 general physical functioning or health behaviours. In our study, the question for SRH  
40 referred to different time frames (e.g. satisfaction with perception of health today in  
41 Germany and perception of health over the *last year* in Sweden). SRH has shown to be  
42 stable over time in population-based studies, suggesting that a considerable component  
43 of SRH reflects an aspect of one's enduring self-concept and to a lesser extent a  
44  
45  
46  
47  
48  
49  
50  
51  
52  
53  
54  
55  
56  
57  
58  
59  
60

1  
2  
3  
4  
5  
6  
7 spontaneous assessment of one's health status <sup>3130</sup>. Thus, the impact of different time  
8 frames on SRH assessment is likely to be small.

Field Code Changed

9  
10 Compared to studies of SRH with mortality outcomes in individuals with diabetes <sup>18 26-</sup>  
11 <sup>27 17-25-26</sup> the strength of the SRH association (with T2DM incidence) found in the present  
12 study was weak. There may be several explanations for this. It has been shown that  
13 diabetes patients have higher mortality rates from several causes <sup>3231</sup>, including cancer  
14 <sup>3332</sup>. It is likely that the comparatively strong association between SRH and mortality is  
15 due to a higher ability for SRH to summarize global health risk among diabetes patients  
16 than specifically metabolic risk in a general population. It is also possible that SRH is  
17 more susceptible to "reporting behaviour" (i.e. how optimistic or pessimistic people are  
18 about their health) <sup>3433</sup> in a generally healthier population compared to subjective health  
19 ratings later on in the disease process.

Field Code Changed

Field Code Changed

Field Code Changed

Field Code Changed

20  
21 Previous findings suggest that there may be sex differences in the SRH-mortality  
22 association <sup>3534</sup> but we found no sex difference in the association between SRH and  
23 T2DM. SRH may also vary across countries <sup>3635</sup>. In the present study, it is likely that the  
24 differences in SRH across centres to some extent can be explained by different sampling  
25 strategies and age distributions at different centres. We did not find support for  
26 heterogeneity in the association between SRH and T2DM across centres in this study.  
27 However, the study was restricted to countries in northern Europe. It is therefore not  
28 clear how these findings are generalisable to other populations. Moreover, in Heidelberg  
29 and Potsdam, the SRH question was assessed in terms of satisfaction with health and in  
30 the other centres in terms of perception of health, which may have had an influence on  
31 the distribution of responses. There were also some differences in response alternatives  
32 between centres. To some extent these differences were handled by standardization but  
33 the differences in the construct of the SRH question between centres are limitations to  
34 this study, particularly to the analysis of heterogeneity.

Field Code Changed

Field Code Changed

35  
36 Strengths of the present study include the thorough ascertainment and verification of  
37 T2DM cases. Moreover, cultural differences may also have an impact on SRH, even within

1  
2  
3  
4  
5  
6 Europe and we included populations from four different European countries<sup>3736</sup>. Several  
7  
8 limitations of the study have already been listed, such as different construct of time  
9  
10 ~~frames for~~ the SRH question and the restriction to countries in northern Europe. We  
11  
12 would also like to point out that it is possible that participants reporting low SRH at  
13  
14 baseline were more likely to seek medical advice during follow-up and hence were more  
15  
16 likely to be tested for diabetes (detection bias). If this was the case, the study may have  
17  
18 overestimated the risk of T2DM associated with low SRH.

19  
20 In our study, part of the SRH-T2DM association seemed to be explained by medical  
21  
22 history as well as lifestyle variables. SRH may therefore be considered as a summary  
23  
24 health measure – also for metabolic health. If there is access to several of the  
25  
26 established risk factors for diabetes, SRH self-rated health is not likely to add more than  
27  
28 marginally to risk prediction on top of the conventional risk factors. However, whether  
29  
30 SRH adds predictive value over and above established risk factors needs to be further  
31  
32 analysed using adequate methods<sup>3837</sup>.

33  
34 In conclusion, results from this prospective case-cohort study provide some evidence  
35  
36 that low self-rated health is associated with a higher risk of type 2 diabetes mellitus. The  
37  
38 association could be only partly explained by other health-related variables, of which  
39  
40 obesity was the strongest.

#### 41 **Acknowledgments**

42  
43 We thank all EPIC participants and staff for their contribution to the study. We thank  
44  
45 Nicola Kerrison (MRC Epidemiology Unit, Cambridge) for managing the data for the  
46  
47 InterAct Project.  
48  
49

#### 50 **Footnotes**

51  
52  
53  
54  
55

Field Code Changed

Field Code Changed

Formatted: Font: Bold

Formatted: Font: Verdana

1  
2  
3  
4  
5  
6  
7 *Contributors:* PW had access to all data for this study, analysed the data, drafted the  
8 manuscript and is the guarantor. All authors qualify for authorship according to BMJ Open  
9 criteria. They have all contributed to conception and design, and interpretation of data,  
10 revising the article critically for important intellectual content and final approval of the  
11 version to be published.  
12  
13

14  
15 *Competing interests:* All authors have completed the Unified Competing Interest form at  
16 [www.icmje.org/coi\\_disclosure.pdf](http://www.icmje.org/coi_disclosure.pdf) (available on request from the corresponding author)  
17 and declare: no support from any organisation for the submitted work; no financial  
18 relationships with any organisation that might have an interest in the submitted work in  
19 the previous three years; no other relationships or activities that could appear to have  
20 influenced the submitted work.  
21  
22  
23  
24

25  
26 *Funding:* Funding for the InterAct project was provided by the EU FP6 programme [grant  
27 number Integrated Project LSHM\_CT\_2006\_037197]. The funder had no role in study  
28 design, data collection and analysis, decision to publish, or preparation of the  
29 manuscript. In addition, InterAct investigators acknowledge funding from the following  
30 agencies: DLvdA and AMWS: Dutch Ministry of Public Health, Welfare and Sports (VWS),  
31 Netherlands Cancer Registry (NKR), LK Research Funds, Dutch Prevention Funds, Dutch  
32 ZON (Zorg Onderzoek Nederland), World Cancer Research Fund (WCRF), Statistics  
33 Netherlands (The Netherlands); RK: Deutsche Krebshilfe.  
34  
35  
36  
37  
38  
39

40 *Ethical approval:* The study was approved by the IARC Institutional Review Board and by  
41 the local review boards of the participating [centres/centers](#).  
42  
43  
44

45 *Data sharing:* No additional data available.  
46  
47  
48  
49  
50  
51  
52  
53  
54  
55

**Table 1** Overview of the five centres included in the study from the EPIC-InterAct study.

| Centre                     | Description of source population                                                                             | Baseline collection    |                    |                                                      |
|----------------------------|--------------------------------------------------------------------------------------------------------------|------------------------|--------------------|------------------------------------------------------|
|                            |                                                                                                              | <i>n</i>               | Women (%)          | 5 <sup>th</sup> and 95 <sup>th</sup> age percentiles |
| <a href="#">Bilthoven</a>  | <a href="#">Participants were invited as age- and sex-stratified random sample of the general population</a> | <a href="#">22,715</a> | <a href="#">55</a> | <a href="#">23–58</a>                                |
| <a href="#">Cambridge</a>  | <a href="#">Volunteers were invited as a random sample of the population listed at general practitioners</a> | <a href="#">30,441</a> | <a href="#">55</a> | <a href="#">45–74</a>                                |
| <a href="#">Heidelberg</a> | <a href="#">Volunteers were invited from the general population</a>                                          | <a href="#">25,540</a> | <a href="#">53</a> | <a href="#">37–63</a>                                |
| <a href="#">Potsdam</a>    | <a href="#">Volunteers were invited from the general population</a>                                          | <a href="#">27,548</a> | <a href="#">60</a> | <a href="#">36–64</a>                                |
| <a href="#">Umeå</a>       | <a href="#">Participants were invited as a random sample of the population</a>                               | <a href="#">25,728</a> | <a href="#">52</a> | <a href="#">30–60</a>                                |



1  
2  
3  
4  
5  
6  
7  
8  
9  
10  
11  
12  
13  
14  
15  
16  
17  
18  
19  
20  
21  
22  
23  
24  
25  
26  
27  
28  
29  
30  
31  
32  
33  
34  
35  
36  
37  
38  
39  
40  
41  
42  
43  
44  
45  
46  
47  
48  
49  
50  
51  
52  
53  
54  
55  
56  
57  
58  
59  
60

**Table 24** Self-rated health by centre in 3,399 incident cases of type 2 diabetes mellitus and 4,619 participants in the subcohort in the EPIC-InterAct study. Data shown are numbers of individuals (percentage).

| Centre     |           | Self-rated health |            |            |          |
|------------|-----------|-------------------|------------|------------|----------|
|            |           | <i>High</i>       |            | <i>Low</i> |          |
|            |           | Excellent         | Good       | Moderate   | Poor     |
| Bilthoven  | Cases     | 13 (4.3)          | 184 (61.5) | 73 (24.4)  | 29 (9.7) |
|            | Subcohort | 52 (9.0)          | 403 (70.0) | 101 (17.5) | 21 (3.6) |
| Cambridge  | Cases     | 92 (12.3)         | 428 (57.1) | 206 (27.5) | 24 (3.2) |
|            | Subcohort | 159 (16.2)        | 624 (63.4) | 170 (17.4) | 23 (2.3) |
| Heidelberg | Cases     | 173 (23.1)        | 395 (52.8) | 156 (20.9) | 24 (3.2) |
|            | Subcohort | 286 (32.9)        | 448 (51.5) | 125 (14.4) | 11 (1.3) |
| Potsdam    | Cases     | 118 (15.2)        | 460 (59.4) | 171 (22.1) | 26 (3.4) |
|            | Subcohort | 274 (23.1)        | 721 (60.9) | 164 (13.9) | 25 (2.1) |
| Umeå       | Cases     | 155 (18.7)        | 369 (44.6) | 236 (28.5) | 67 (8.1) |
|            | Subcohort | 265 (26.2)        | 477 (47.1) | 215 (21.2) | 55 (5.4) |

**Table 32** Baseline characteristics of subcohort individuals in the EPIC-InterAct study by categories of self-rated health. Data are presented as mean and standard deviations (SD) for continuous variables and percentages and frequencies for categorical variables.

|                                      | Self-rated health |       |        |       |          |       |        |       | <i>p</i> -value for overall difference* |
|--------------------------------------|-------------------|-------|--------|-------|----------|-------|--------|-------|-----------------------------------------|
|                                      | High              |       |        |       | Low      |       |        |       |                                         |
|                                      | Excellent         |       | Good   |       | Moderate |       | Poor   |       |                                         |
|                                      | Mean/%            | SD/N  | Mean/% | SD/N  | Mean/%   | SD/N  | Mean/% | SD/N  |                                         |
| Age (years)                          | 48.8              | 10.3  | 50.5   | 11.1  | 51.7     | 10.9  | 50.3   | 10.2  | <0.001                                  |
| Sex (% men)                          | 42.8              | 443   | 45.2   | 1208  | 44.8     | 347   | 37.8   | 51    | 0.24                                    |
| Educational level (%)                |                   |       |        |       |          |       |        |       | <0.001                                  |
| Primary school or none               | 19.2              | 194   | 24.4   | 635   | 37.9     | 287   | 30.8   | 40    |                                         |
| Technical/professional school        | 34.6              | 351   | 35.0   | 910   | 29.6     | 224   | 32.3   | 42    |                                         |
| Secondary school                     | 14.9              | 151   | 14.2   | 369   | 14.4     | 109   | 18.5   | 24    |                                         |
| Higher (incl. university degree)     | 31.3              | 317   | 26.4   | 688   | 18.1     | 137   | 18.5   | 24    |                                         |
| BMI (kg/m <sup>2</sup> )             | 24.8              | 3.4   | 25.5   | 4.0   | 26.2     | 4.5   | 25.6   | 5.4   | <0.001                                  |
| Smoking status (%)                   |                   |       |        |       |          |       |        |       | <0.001                                  |
| Never                                | 52.1              | 540   | 46.6   | 1246  | 41.7     | 323   | 40.7   | 55    |                                         |
| Former                               | 27.5              | 285   | 30.1   | 804   | 30.1     | 233   | 23.7   | 32    |                                         |
| Current                              | 18.8              | 195   | 21.0   | 561   | 26.1     | 202   | 32.6   | 44    |                                         |
| Unknown                              | 1.5               | 16    | 2.3    | 62    | 2.2      | 17    | 3.0    | 4     |                                         |
| Physical activity (%)                |                   |       |        |       |          |       |        |       | <0.001                                  |
| Inactive                             | 15.9              | 160   | 21.3   | 548   | 31.1     | 231   | 43.3   | 52    |                                         |
| Moderately inactive                  | 33.2              | 335   | 31.7   | 818   | 28.8     | 214   | 29.2   | 35    |                                         |
| Moderately active                    | 25.5              | 257   | 26.8   | 689   | 21.8     | 162   | 15.0   | 18    |                                         |
| Active                               | 25.5              | 257   | 20.2   | 521   | 18.2     | 135   | 12.5   | 15    |                                         |
| Alcohol consumption (g/d)            | 11.5              | 16.2  | 10.8   | 15.2  | 9.2      | 15.4  | 5.6    | 9.8   | <0.001                                  |
| Total energy intake (kcal)           | 2016.6            | 649.7 | 2056.7 | 618.3 | 2009.4   | 617.3 | 1928.3 | 617.9 | 0.007                                   |
| Hypertension (%)                     | 16.0              | 165   | 22.8   | 600   | 32.7     | 245   | 33.3   | 44    | <0.001                                  |
| History of myocardial infarction (%) | 0.4               | 4     | 1.5    | 40    | 3.6      | 28    | 3.7    | 5     | <0.001                                  |

\*Comparing excellent, good, moderate, and poor self-rated health

1  
2  
3  
4  
5  
6  
7  
8  
9  
10  
11  
12  
13  
14  
15  
16  
17  
18  
19  
20  
21  
22  
23  
24  
25  
26  
27  
28  
29  
30  
31  
32  
33  
34  
35  
36  
37  
38  
39  
40  
41  
42  
43  
44  
45  
46  
47  
48  
49  
50  
51  
52  
53  
54  
55  
56  
57  
58  
59  
60

**Table 43** Pooled hazard ratios of incident T2DM comparing low (moderate or poor) versus high (excellent or good) self-rated health.

|                                   | High self-rated health | Low self-rated health |
|-----------------------------------|------------------------|-----------------------|
|                                   | Pooled HR (95% CI)     | Pooled HR (95% CI)*   |
| Model 1: Adjusted for age and sex | 1.00 (referent)        | 1.67 (1.48 to 1.88)   |
| Model 1 + education               | 1.00 (referent)        | 1.60 (1.42 to 1.81)   |
| Model 1 + BMI                     | 1.00 (referent)        | 1.38 (1.19 to 1.60)   |
| Model 1 + smoking                 | 1.00 (referent)        | 1.67 (1.48 to 1.89)   |
| Model 1 + physical activity       | 1.00 (referent)        | 1.59 (1.41 to 1.80)   |
| Model 1 + alcohol consumption     | 1.00 (referent)        | 1.67 (1.48 to 1.89)   |
| Model 1 + energy intake           | 1.00 (referent)        | 1.67 (1.48 to 1.88)   |
| Model 1 + hypertension            | 1.00 (referent)        | 1.48 (1.31 to 1.69)   |
| Model 1 + all covariates above    | 1.00 (referent)        | 1.29 (1.09 to 1.53)   |

\*Pooled hazard ratios calculated using a centre-stratified approach in combination with a random effects meta-analysis.

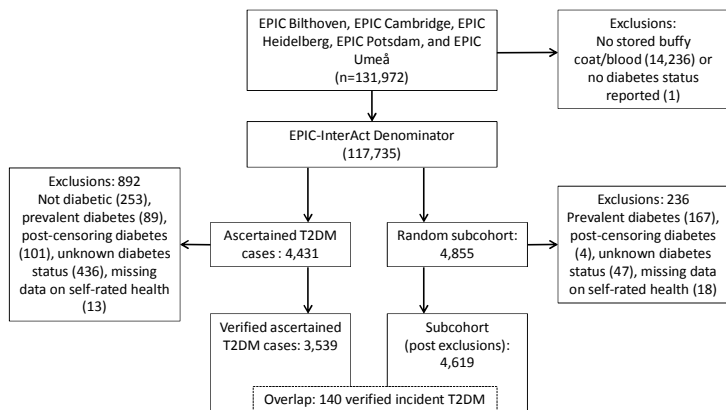

Figure 1 Overview of the five centres included in the study from the EPIC-InterAct study.

- Formatted: Font: Calibri, Bold
- Formatted: Font: Not Bold
- Formatted: Font: Not Bold
- Formatted: Font: Calibri, Bold, Not Italic

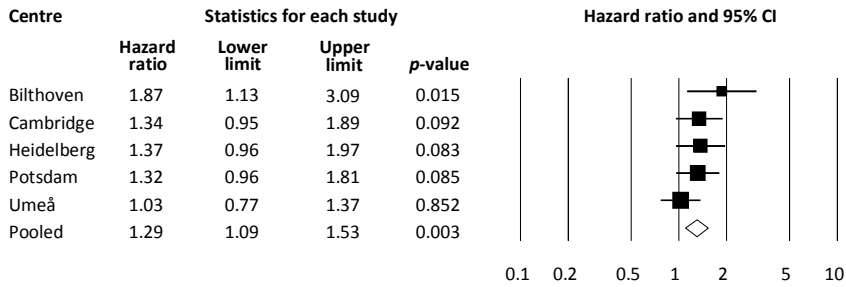

$p$ -value for heterogeneity 0.33,  $I^2$  index 13.3%

**Figure 24** Centre-specific and pooled hazard ratios of incident T2DM adjusted for the variables in the final model (age, sex, education, BMI, smoking, physical activity, alcohol consumption, energy intake and hypertension).

## References

1. Danaei G, Finucane MM, Lu Y, Singh GM, Cowan MJ, Paciorek CJ, et al. National, regional, and global trends in fasting plasma glucose and diabetes prevalence since 1980: systematic analysis of health examination surveys and epidemiological studies with 370 country-years and 2.7 million participants. *Lancet* 2011;378(9785):31-40.
2. Shaw JE, Sicree RA, Zimmet PZ. Global estimates of the prevalence of diabetes for 2010 and 2030. *Diabetes Res Clin Pract* 2010;87(1):4-14.
3. Idler EL, Benyamini Y. Self-rated health and mortality: a review of twenty-seven community studies. *J Health Soc Behav*. 1997;38(1):21-37.
4. Benyamini Y. Why does self-rated health predict mortality? An update on current knowledge and a research agenda for psychologists. *Psychol Health* 2011;26(11):1407-13.
5. Halford C, Anderzen I, Arnetz B. Endocrine measures of stress and self-rated health: a longitudinal study. *J Psychosom Res* 2003;55(4):317-20.
6. DeSalvo KB, Blosner N, Reynolds K, He J, Muntner P. Mortality prediction with a single general self-rated health question. A meta-analysis. *J Gen Intern Med* 2006;21(3):267-75.
7. Mavaddat N, Kinmonth AL, Sanderson S, Surtees P, Bingham S, Khaw KT. What determines Self-Rated Health (SRH)? A cross-sectional study of SF-36 health domains in the EPIC-Norfolk cohort. *J Epidemiol Community Health* 2011;65(9):800-6.
8. DeSalvo KB, Jones TM, Peabody J, McDonald J, Fihn S, Fan V, et al. Health care expenditure prediction with a single item, self-rated health measure. *Med Care* 2009;47(4):440-7.
9. Ramkumar A, Quah JL, Wong T, Yeo LS, Nieh CC, Shankar A, et al. Self-rated health, associated factors and diseases: a community-based cross-sectional study of Singaporean adults aged 40 years and above. *Ann Acad Med Singapore* 2009;38(7):606-7.
10. Shadbolt B. Some correlates of self-rated health for Australian women. *Am J Public Health* 1997;87(6):951-6.
11. Manor O, Matthews S, Power C. Self-rated health and limiting longstanding illness: inter-relationships with morbidity in early adulthood. *Int J Epidemiol* 2001;30(3):600-7.
12. Leosdottir M, Willenheimer R, Persson M, Nilsson PM. The association between glucometabolic disturbances, traditional cardiovascular risk factors and self-rated health by age and gender: a cross-sectional analysis within the Malmo Preventive Project. *Cardiovasc Diabetol* 2011;10:118.
13. Tapp RJ, O'Neil A, Shaw JE, Zimmet PZ, Oldenburg BF. Is there a link between components of health-related functioning and incident impaired glucose metabolism and type 2 diabetes? The Australian Diabetes Obesity and Lifestyle (AusDiab) study. *Diabetes Care* 2010;33(4):757-62.
14. Latham K, Peek CW. Self-rated health and morbidity onset among late midlife u.s. Adults. *J Gerontol B Psychol Sci Soc Sci*. 2013;68(1):107-16.
15. Riboli E, Hunt KJ, Slimani N, Ferrari P, Norat T, Fahey M, et al. European Prospective Investigation into Cancer and Nutrition (EPIC): study populations and data collection. *Public Health Nutr* 2002;5(6B):1113-24.
16. Langenberg C, Sharp S, Forouhi NG, Franks PW, Schulze MB, Kerrison N, et al. Design and cohort description of the InterAct Project: an examination of the interaction of genetic and lifestyle factors on the incidence of type 2 diabetes in the EPIC Study. *Diabetologia* 2011;54(9):2272-82.
17. Walker JD, Maxwell CJ, Hogan DB, Ebly EM. Does self-rated health predict survival in older persons with cognitive impairment? *J Am Geriatr Soc*. 2004;52(11):1895-900.
18. McEwen LN, Kim C, Haan MN, Ghosh D, Lantz PM, Thompson TJ, et al. Are health-related quality-of-life and self-rated health associated with mortality? Insights from Translating Research Into Action for Diabetes (TRIAD). *Prim Care Diabetes* 2009;3(1):37-42.

Formatted: Font: Italic, Do not check spelling or grammar

Formatted: Font: Italic, Do not check spelling or grammar

Formatted: Font: Italic, Do not check spelling or grammar

Formatted: Font: Italic, Do not check spelling or grammar

Formatted: Font: Italic, Do not check spelling or grammar

Formatted: Font: Italic, Do not check spelling or grammar

Formatted: Font: Italic, Do not check spelling or grammar

Formatted: Font: Italic, Do not check spelling or grammar

Formatted: Font: Italic, Do not check spelling or grammar

Formatted: Font: Italic, Do not check spelling or grammar

Formatted: Font: Italic, Do not check spelling or grammar

Formatted: Font: Italic, Do not check spelling or grammar

Formatted: Font: Italic, Do not check spelling or grammar

Formatted: Font: Italic, Do not check spelling or grammar

Formatted: Font: Italic, Do not check spelling or grammar

Formatted: Font: Italic, Do not check spelling or grammar

Formatted: Font: Italic, Do not check spelling or grammar

Formatted: Font: Italic, Do not check spelling or grammar

1  
2  
3  
4  
5  
6  
7  
8  
9  
10  
11  
12  
13  
14  
15  
16  
17  
18  
19  
20  
21  
22  
23  
24  
25  
26  
27  
28  
29  
30  
31  
32  
33  
34  
35  
36  
37  
38  
39  
40  
41  
42  
43  
44  
45  
46  
47  
48  
49  
50  
51  
52  
53  
54  
55  
56  
57  
58  
59  
60

19. Lee SJ, Moody-Ayers SY, Landefeld CS, Walter LC, Lindquist K, Segal MR, et al. The relationship between self-rated health and mortality in older black and white Americans. *J. Am. Geriatr. Soc.* 2007;55(10):1624-9.
20. Pischon T, Boeing H, Hoffmann K, Bergmann M, Schulze MB, Overvad K, et al. General and abdominal adiposity and risk of death in Europe. *N Engl J Med* 2008;359(20):2105-20.
21. Validity of a short questionnaire to assess physical activity in 10 European countries. *Eur J Epidemiol* 2012;27(1):15-25.
22. Barlow WE, Ichikawa L, Rosner D, Izumi S. Analysis of case-cohort designs. *J Clin Epidemiol* 1999;52(12):1165-72.
23. Singh-Manoux A, Martikainen P, Ferrie J, Zins M, Marmot M, Goldberg M. What does self rated health measure? Results from the British Whitehall II and French Gazel cohort studies. *J. Epidemiol. Community Health* 2006;60(4):364-72.
24. Kenward MG, Carpenter J. Multiple imputation: current perspectives. *Stat. Methods Med. Res.* 2007;16(3):199-218.
25. Benjamins MR, Hummer RA, Eberstein IW, Nam CB. Self-reported health and adult mortality risk: an analysis of cause-specific mortality. *Soc Sci Med* 2004;59(6):1297-306.
26. Wennberg P, Rolandsson O, Jerden L, Boeing H, Sluik D, Kaaks R, et al. Self-rated health and mortality in individuals with diabetes mellitus: prospective cohort study. *BMJ Open* 2012;2(1):e000760.
27. Dasbach EJ, Klein R, Klein BE, Moss SE. Self-rated health and mortality in people with diabetes. *Am J Public Health* 1994;84(11):1775-9.
28. Prosper MH, Moczulski VL, Qureshi A. Obesity as a predictor of self-rated health. *Am J Health Behav* 2009;33(3):319-29.
29. Haffner SM. Relationship of metabolic risk factors and development of cardiovascular disease and diabetes. *Obesity (Silver Spring)* 2006;14 Suppl 3:121S-27S.
30. Krause NM, Jay GM. What do global self-rated health items measure? *Med Care* 1994;32(9):930-42.
31. Bailis DS, Segall A, Chipperfield JG. Two views of self-rated general health status. *Soc. Sci. Med.* 2003;56(2):203-17.
32. Gregg EW, Gu Q, Cheng YJ, Narayan KM, Cowie CC. Mortality trends in men and women with diabetes, 1971 to 2000. *Ann. Intern. Med.* 2007;147(3):149-55.
33. Vigneri P, Frasca F, Sciacca L, Pandini G, Vigneri R. Diabetes and cancer. *Endocr Relat Cancer* 2009;16(4):1103-23.
34. Layes A, Asada Y, Kpart G. Whiners and deniers - What does self-rated health measure? *Soc. Sci. Med.* 2011.
35. Benyamini Y, Blumstein T, Lusky A, Modan B. Gender differences in the self-rated health-mortality association: is it poor self-rated health that predicts mortality or excellent self-rated health that predicts survival? *Gerontologist* 2003;43(3):396-405; discussion 372-5.
36. Vadla D, Bozikov J, Akerstrom B, Cheung WY, Kovacic L, Masanovic M, et al. Differences in healthcare service utilisation in elderly, registered in eight districts of five European countries. *Scand J Public Health* 2011;39(3):272-9.
37. Jylha M, Guralnik JM, Ferrucci L, Jokela J, Heikkinen E. Is self-rated health comparable across cultures and genders? *J. Gerontol. B. Psychol. Sci. Soc. Sci.* 1998;53(3):S144-52.
38. Pencina MJ, D'Agostino RB, Sr., D'Agostino RB, Jr., Vasan RS. Evaluating the added predictive ability of a new marker: from area under the ROC curve to reclassification and beyond. *Stat. Med.* 2008;27(2):157-72; discussion 207-12.
1. Danaei G, Finucane MM, Lu Y, Singh GM, Cowan MJ, Paciorek CJ, et al. National, regional, and global trends in fasting plasma glucose and diabetes prevalence since 1980: systematic analysis of health examination surveys and epidemiological studies with 370 country-years and 2.7 million participants. *Lancet* 2011;378(9785):31-40.

**Formatted:** Font: Italic, Do not check spelling or grammar

**Formatted:** Font: Italic, Do not check spelling or grammar

**Formatted:** Font: Italic, Do not check spelling or grammar

**Formatted:** Font: Italic, Do not check spelling or grammar

**Formatted:** Font: Italic, Do not check spelling or grammar

**Formatted:** Font: Italic, Do not check spelling or grammar

**Formatted:** Font: Italic, Do not check spelling or grammar

**Formatted:** Font: Italic, Do not check spelling or grammar

**Formatted:** Font: Italic, Do not check spelling or grammar

**Formatted:** Font: Italic, Do not check spelling or grammar

**Formatted:** Font: Italic, Do not check spelling or grammar

**Formatted:** Font: Italic, Do not check spelling or grammar

**Formatted:** Font: Italic, Do not check spelling or grammar

**Formatted:** Font: Italic, Do not check spelling or grammar

**Formatted:** Font: Italic, Do not check spelling or grammar

**Formatted:** Font: Italic, Do not check spelling or grammar

**Formatted:** Font: Italic, Do not check spelling or grammar

**Formatted:** Font: Italic, Do not check spelling or grammar

**Formatted:** Font: Italic, Do not check spelling or grammar

**Formatted:** Font: Italic, Do not check spelling or grammar

**Formatted:** Font: Italic, Do not check spelling or grammar

**Formatted:** Font: Italic, Do not check spelling or grammar

**Formatted:** Indent: Left: 0", Hanging: 0.5", Space After: 0 pt, Line spacing: single

2. Shaw JE, Sicree RA, Zimmet PZ. Global estimates of the prevalence of diabetes for 2010 and 2030. *Diabetes Res Clin Pract* 2010;87(1):4-14.
3. Idler EL, Benyamini Y. Self-rated health and mortality: a review of twenty-seven community studies. *J Health Soc Behav*. 1997;38(1):21-37.
4. Benyamini Y. Why does self-rated health predict mortality? An update on current knowledge and a research agenda for psychologists. *Psychol Health* 2011;26(11):1407-13.
5. Halford C, Anderzen I, Arnetz B. Endocrine measures of stress and self-rated health: a longitudinal study. *J Psychosom Res* 2003;55(4):317-20.
6. DeSalvo KB, Bloser N, Reynolds K, He J, Muntner P. Mortality prediction with a single general self-rated health question. A meta-analysis. *J Gen Intern Med* 2006;21(3):267-75.
7. Mavaddat N, Kinmonth AL, Sanderson S, Surtees P, Bingham S, Khaw KT. What determines Self-Rated Health (SRH)? A cross-sectional study of SF-36 health domains in the EPIC-Norfolk cohort. *J Epidemiol Community Health* 2011;65(9):800-6.
8. DeSalvo KB, Jones TM, Peabody J, McDonald J, Fihn S, Fan V, et al. Health care expenditure prediction with a single item, self-rated health measure. *Med Care* 2009;47(4):440-7.
9. Ramkumar A, Quah JL, Wong T, Yeo LS, Nieh CC, Shankar A, et al. Self-rated health, associated factors and diseases: a community-based cross-sectional study of Singaporean adults aged 40 years and above. *Ann Acad Med Singapore* 2009;38(7):606-7.
10. Shadbolt B. Some correlates of self-rated health for Australian women. *Am J Public Health* 1997;87(6):951-6.
11. Manor O, Matthews S, Power C. Self-rated health and limiting longstanding illness: inter-relationships with morbidity in early adulthood. *Int J Epidemiol* 2001;30(3):600-7.
12. Leosdottir M, Willenheimer R, Persson M, Nilsson PM. The association between glucometabolic disturbances, traditional cardiovascular risk factors and self-rated health by age and gender: a cross-sectional analysis within the Malmo Preventive Project. *Cardiovasc Diabetol* 2011;10:118.
13. Tapp RJ, O'Neil A, Shaw JE, Zimmet PZ, Oldenburg BF. Is there a link between components of health-related functioning and incident impaired glucose metabolism and type 2 diabetes? The Australian Diabetes Obesity and Lifestyle (AusDiab) study. *Diabetes Care* 2010;33(4):757-62.
14. Riboli E, Hunt KJ, Slimani N, Ferrari P, Norat T, Fahey M, et al. European Prospective Investigation into Cancer and Nutrition (EPIC): study populations and data collection. *Public Health Nutr* 2002;5(6B):1113-24.
15. Langenberg C, Sharp S, Forouhi NG, Franks PW, Schulze MB, Kerrison N, et al. Design and cohort description of the InterAct Project: an examination of the interaction of genetic and lifestyle factors on the incidence of type 2 diabetes in the EPIC Study. *Diabetologia* 2011;54(9):2272-82.
16. Walker JD, Maxwell CJ, Hogan DB, Eby EM. Does self-rated health predict survival in older persons with cognitive impairment? *J Am Geriatr Soc*. 2004;52(11):1895-900.
17. McEwen LN, Kim C, Haan MN, Ghosh D, Lantz PM, Thompson TJ, et al. Are health-related quality of life and self-rated health associated with mortality? Insights from Translating Research Into Action for Diabetes (TRIAD). *Prim Care Diabetes* 2009;3(1):37-42.
18. Lee SJ, Moody-Ayers SY, Landefeld CS, Walter LC, Lindquist K, Segal MR, et al. The relationship between self-rated health and mortality in older black and white Americans. *J Am Geriatr Soc*. 2007;55(10):1624-9.
19. Pischon T, Boeing H, Hoffmann K, Bergmann M, Schulze MB, Overvad K, et al. General and abdominal adiposity and risk of death in Europe. *N Engl J Med* 2008;359(20):2105-20.
20. Validity of a short questionnaire to assess physical activity in 10 European countries. *Eur J Epidemiol* 2012;27(1):15-25.
21. Barlow WE, Ichikawa L, Rosner D, Izumi S. Analysis of case-cohort designs. *J Clin Epidemiol* 1999;52(12):1165-72.



1  
2  
3  
4  
5  
6  
7  
8  
9  
10  
11  
12  
13  
14  
15  
16  
17  
18  
19  
20  
21  
22  
23  
24  
25  
26  
27  
28  
29  
30  
31  
32  
33  
34  
35  
36  
37  
38  
39  
40  
41  
42  
43  
44  
45  
46  
47  
48  
49  
50  
51  
52  
53  
54  
55  
56  
57  
58  
59  
60

22. Singh-Manoux A, Martikainen P, Ferrie J, Zins M, Marmot M, Goldberg M. What does self-rated health measure? Results from the British Whitehall II and French Gazel cohort studies. *J Epidemiol Community Health* 2006;60(4):364-72.
23. Kenward MG, Carpenter J. Multiple imputation: current perspectives. *Stat Methods Med Res*. 2007;16(3):199-218.
24. Benjamins MR, Hummer RA, Eberstein IW, Nam CB. Self-reported health and adult mortality risk: an analysis of cause-specific mortality. *Soc Sci Med* 2004;59(6):1297-306.
25. Wennberg P, Rolandsson O, Jerden L, Boeing H, Sluik D, Kaaks R, et al. Self-rated health and mortality in individuals with diabetes mellitus: prospective cohort study. *BMJ Open* 2012;2(1):e000760.
26. Dasbach EJ, Klein R, Klein BE, Moss SE. Self-rated health and mortality in people with diabetes. *Am J Public Health* 1994;84(11):1775-9.
27. Prosper MH, Moczulski VL, Qureshi A. Obesity as a predictor of self-rated health. *Am J Health Behav* 2009;33(3):319-29.
28. Haffner SM. Relationship of metabolic risk factors and development of cardiovascular disease and diabetes. *Obesity (Silver Spring)* 2006;14 Suppl 3:121S-27S.
29. Krause NM, Jay GM. What do global self-rated health items measure? *Med Care* 1994;32(9):930-42.
30. Bailis DS, Segall A, Chipperfield JG. Two views of self-rated general health status. *Soc Sci Med*. 2003;56(2):203-17.
31. Gregg EW, Gu Q, Cheng YJ, Narayan KM, Cowie CC. Mortality trends in men and women with diabetes, 1971 to 2000. *Ann Intern Med*. 2007;147(3):149-55.
32. Vigneri P, Frasca F, Sciacca L, Pandini G, Vigneri R. Diabetes and cancer. *Endocr Relat Cancer* 2009;16(4):1103-23.
33. Layes A, Asada Y, Keparat G. Whiners and deniers—What does self-rated health measure? *Soc Sci Med*. 2011.
34. Benyamini Y, Blumstein T, Lusky A, Modan B. Gender differences in the self-rated health-mortality association: is it poor self-rated health that predicts mortality or excellent self-rated health that predicts survival? *Gerontologist* 2003;43(3):396-405; discussion 372-5.
35. Vadla D, Bozikov J, Akerstrom B, Cheung WY, Kovacic L, Masanovic M, et al. Differences in healthcare service utilisation in elderly, registered in eight districts of five European countries. *Scand J Public Health* 2011;39(3):272-9.
36. Jylha M, Guralnik JM, Ferrucci L, Jokela J, Heikkinen E. Is self-rated health comparable across cultures and genders? *J Gerontol B Psychol Sci Soc Sci*. 1998;53(3):S144-52.
37. Pencina MJ, D'Agostino RB, Sr., D'Agostino RB, Jr., Vasan RS. Evaluating the added predictive ability of a new marker: from area under the ROC curve to reclassification and beyond. *Stat Med*. 2008;27(2):157-72; discussion 207-12.

## Appendix

All questionnaires were standardized to fit the question (with four response alternatives):

*How satisfied are you today with your health?*

1 Excellent

1  
2  
3  
4  
5  
6  
7  
8  
9  
10  
11  
12  
13  
14  
15  
16  
17  
18  
19  
20  
21  
22  
23  
24  
25  
26  
27  
28  
29  
30  
31  
32  
33  
34  
35  
36  
37  
38  
39  
40  
41  
42  
43  
44  
45  
46  
47  
48  
49  
50  
51  
52  
53  
54  
55  
56  
57  
58  
59  
60

2 *Good*

3 *Moderate*

4 *Poor*

Description of the original questions and how they were standardized:

Bilthoven 1993–94

Question: *What do you think about your health in general?*

| Response alternatives          | Standardized  |
|--------------------------------|---------------|
| 1 Excellent                    | 1 Excellent   |
| 2 Good                         | 2 Good        |
| 3 Reasonable                   | 3 Moderate    |
| 4 Mediocre                     | 4 Poor        |
| 5 Poor                         | 4 Poor        |
| 9 More than 1 option indicated | Missing value |

Bilthoven 1995–97

Question: *What do you think about your health in general?*

| Response alternatives          | Standardized  |
|--------------------------------|---------------|
| 1 Excellent                    | 1 Excellent   |
| 2 Very good                    | 2 Good        |
| 3 Good                         | 2 Good        |
| 4 Reasonable                   | 3 Moderate    |
| 5 Mediocre                     | 4 Poor        |
| 9 More than 1 option indicated | Missing value |

Cambridge

Question: *How would you rate your general health?*

| Response alternatives | Standardized |
|-----------------------|--------------|
| 1 Excellent           | 1 Excellent  |
| 2 Good                | 2 Good       |
| 3 Moderate            | 3 Moderate   |
| 4 Poor                | 4 Poor       |

Heidelberg

Question: *On the whole, how satisfied are you today with your health?*

| Response alternatives | Standardized  |
|-----------------------|---------------|
| 1 Very satisfied      | 1 Excellent   |
| 2 More satisfied      | 2 Good        |
| 3 More dissatisfied   | 3 Moderate    |
| 4 Very dissatisfied   | 4 Poor        |
| 8 Do not know         | Missing value |

1  
2  
3  
4  
5  
6  
7  
8  
9  
10  
11  
12  
13  
14  
15  
16  
17  
18  
19  
20  
21  
22  
23  
24  
25  
26  
27  
28  
29  
30  
31  
32  
33  
34  
35  
36  
37  
38  
39  
40  
41  
42  
43  
44  
45  
46  
47  
48  
49  
50  
51  
52  
53  
54  
55  
56  
57  
58  
59  
60

Potsdam

Question: *On the whole, how satisfied are you today with your health?*

| Response alternatives      | Standardized  |
|----------------------------|---------------|
| 1 Very satisfied           | 1 Excellent   |
| 2 More likely satisfied    | 2 Good        |
| 3 More likely dissatisfied | 3 Moderate    |
| 4 Very dissatisfied        | 4 Poor        |
| 8 Do not know              | Missing value |

Umeå

Question: *How do you judge that your state of health has been in the last year?*

| Response alternatives | Standardized  |
|-----------------------|---------------|
| 1 Very well           | 1 Excellent   |
| 2 Quiet well          | 2 Good        |
| 3 Fairly well         | 3 Moderate    |
| 4 Quiet bad           | 4 Poor        |
| 5 Bad                 | 4 Poor        |
| 9 Inconsistent answer | Missing value |

## STROBE Statement—checklist of items that should be included in reports of observational studies

|                              | Item No | Recommendation                                                                                                                                                                                                                                                                                                                                                                                                                                                                                                                                                                                                                                                                                   |
|------------------------------|---------|--------------------------------------------------------------------------------------------------------------------------------------------------------------------------------------------------------------------------------------------------------------------------------------------------------------------------------------------------------------------------------------------------------------------------------------------------------------------------------------------------------------------------------------------------------------------------------------------------------------------------------------------------------------------------------------------------|
| <b>Title and abstract</b>    | 1       | (a) Indicate the study's design with a commonly used term in the title or the abstract<br>(b) Provide in the abstract an informative and balanced summary of what was done and what was found                                                                                                                                                                                                                                                                                                                                                                                                                                                                                                    |
| <b>Introduction</b>          |         |                                                                                                                                                                                                                                                                                                                                                                                                                                                                                                                                                                                                                                                                                                  |
| Background/rationale         | 2       | Explain the scientific background and rationale for the investigation being reported                                                                                                                                                                                                                                                                                                                                                                                                                                                                                                                                                                                                             |
| Objectives                   | 3       | State specific objectives, including any prespecified hypotheses                                                                                                                                                                                                                                                                                                                                                                                                                                                                                                                                                                                                                                 |
| <b>Methods</b>               |         |                                                                                                                                                                                                                                                                                                                                                                                                                                                                                                                                                                                                                                                                                                  |
| Study design                 | 4       | Present key elements of study design early in the paper                                                                                                                                                                                                                                                                                                                                                                                                                                                                                                                                                                                                                                          |
| Setting                      | 5       | Describe the setting, locations, and relevant dates, including periods of recruitment, exposure, follow-up, and data collection                                                                                                                                                                                                                                                                                                                                                                                                                                                                                                                                                                  |
| Participants                 | 6       | (a) <i>Cohort study</i> —Give the eligibility criteria, and the sources and methods of selection of participants. Describe methods of follow-up<br><i>Case-control study</i> —Give the eligibility criteria, and the sources and methods of case ascertainment and control selection. Give the rationale for the choice of cases and controls<br><i>Cross-sectional study</i> —Give the eligibility criteria, and the sources and methods of selection of participants<br>(b) <i>Cohort study</i> —For matched studies, give matching criteria and number of exposed and unexposed<br><i>Case-control study</i> —For matched studies, give matching criteria and the number of controls per case |
| Variables                    | 7       | Clearly define all outcomes, exposures, predictors, potential confounders, and effect modifiers. Give diagnostic criteria, if applicable                                                                                                                                                                                                                                                                                                                                                                                                                                                                                                                                                         |
| Data sources/<br>measurement | 8*      | For each variable of interest, give sources of data and details of methods of assessment (measurement). Describe comparability of assessment methods if there is more than one group                                                                                                                                                                                                                                                                                                                                                                                                                                                                                                             |
| Bias                         | 9       | Describe any efforts to address potential sources of bias                                                                                                                                                                                                                                                                                                                                                                                                                                                                                                                                                                                                                                        |
| Study size                   | 10      | Explain how the study size was arrived at                                                                                                                                                                                                                                                                                                                                                                                                                                                                                                                                                                                                                                                        |
| Quantitative variables       | 11      | Explain how quantitative variables were handled in the analyses. If applicable, describe which groupings were chosen and why                                                                                                                                                                                                                                                                                                                                                                                                                                                                                                                                                                     |
| Statistical methods          | 12      | (a) Describe all statistical methods, including those used to control for confounding<br>(b) Describe any methods used to examine subgroups and interactions<br>(c) Explain how missing data were addressed<br>(d) <i>Cohort study</i> —If applicable, explain how loss to follow-up was addressed<br><i>Case-control study</i> —If applicable, explain how matching of cases and controls was addressed<br><i>Cross-sectional study</i> —If applicable, describe analytical methods taking account of sampling strategy<br>(e) Describe any sensitivity analyses                                                                                                                                |

Continued on next page

**Results**

|                  |     |                                                                                                                                                                                                                                                                                                                                                                                                               |
|------------------|-----|---------------------------------------------------------------------------------------------------------------------------------------------------------------------------------------------------------------------------------------------------------------------------------------------------------------------------------------------------------------------------------------------------------------|
| Participants     | 13* | (a) Report numbers of individuals at each stage of study—eg numbers potentially eligible, examined for eligibility, confirmed eligible, included in the study, completing follow-up, and analysed<br>(b) Give reasons for non-participation at each stage<br>(c) Consider use of a flow diagram                                                                                                               |
| Descriptive data | 14* | (a) Give characteristics of study participants (eg demographic, clinical, social) and information on exposures and potential confounders<br>(b) Indicate number of participants with missing data for each variable of interest<br>(c) <i>Cohort study</i> —Summarise follow-up time (eg, average and total amount)                                                                                           |
| Outcome data     | 15* | <i>Cohort study</i> —Report numbers of outcome events or summary measures over time<br><i>Case-control study</i> —Report numbers in each exposure category, or summary measures of exposure<br><i>Cross-sectional study</i> —Report numbers of outcome events or summary measures                                                                                                                             |
| Main results     | 16  | (a) Give unadjusted estimates and, if applicable, confounder-adjusted estimates and their precision (eg, 95% confidence interval). Make clear which confounders were adjusted for and why they were included<br>(b) Report category boundaries when continuous variables were categorized<br>(c) If relevant, consider translating estimates of relative risk into absolute risk for a meaningful time period |
| Other analyses   | 17  | Report other analyses done—eg analyses of subgroups and interactions, and sensitivity analyses                                                                                                                                                                                                                                                                                                                |

**Discussion**

|                  |    |                                                                                                                                                                            |
|------------------|----|----------------------------------------------------------------------------------------------------------------------------------------------------------------------------|
| Key results      | 18 | Summarise key results with reference to study objectives                                                                                                                   |
| Limitations      | 19 | Discuss limitations of the study, taking into account sources of potential bias or imprecision. Discuss both direction and magnitude of any potential bias                 |
| Interpretation   | 20 | Give a cautious overall interpretation of results considering objectives, limitations, multiplicity of analyses, results from similar studies, and other relevant evidence |
| Generalisability | 21 | Discuss the generalisability (external validity) of the study results                                                                                                      |

**Other information**

|         |    |                                                                                                                                                               |
|---------|----|---------------------------------------------------------------------------------------------------------------------------------------------------------------|
| Funding | 22 | Give the source of funding and the role of the funders for the present study and, if applicable, for the original study on which the present article is based |
|---------|----|---------------------------------------------------------------------------------------------------------------------------------------------------------------|

\*Give information separately for cases and controls in case-control studies and, if applicable, for exposed and unexposed groups in cohort and cross-sectional studies.

**Note:** An Explanation and Elaboration article discusses each checklist item and gives methodological background and published examples of transparent reporting. The STROBE checklist is best used in conjunction with this article (freely available on the Web sites of PLoS Medicine at <http://www.plosmedicine.org/>, Annals of Internal Medicine at <http://www.annals.org/>, and Epidemiology at <http://www.epidem.com/>). Information on the STROBE Initiative is available at [www.strobe-statement.org](http://www.strobe-statement.org).

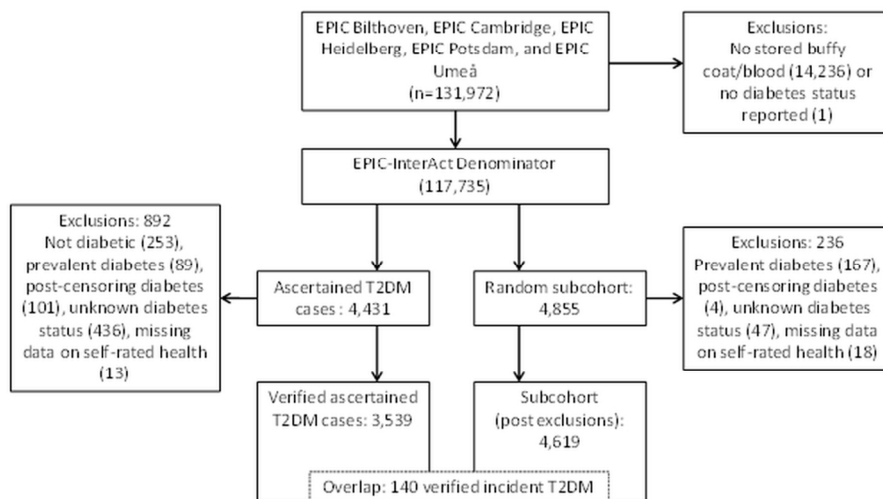

**Figure 1** Overview of the five centres included in the study from the EPIC-InterAct study.

105x90mm (300 x 300 DPI)

1  
2  
3  
4  
5  
6  
7  
8  
9  
10  
11  
12  
13  
14  
15  
16  
17  
18  
19  
20  
21  
22  
23  
24  
25  
26  
27  
28  
29  
30  
31  
32  
33  
34  
35  
36  
37  
38  
39  
40  
41  
42  
43  
44  
45  
46  
47  
48  
49  
50  
51  
52  
53  
54  
55  
56  
57  
58  
59  
60

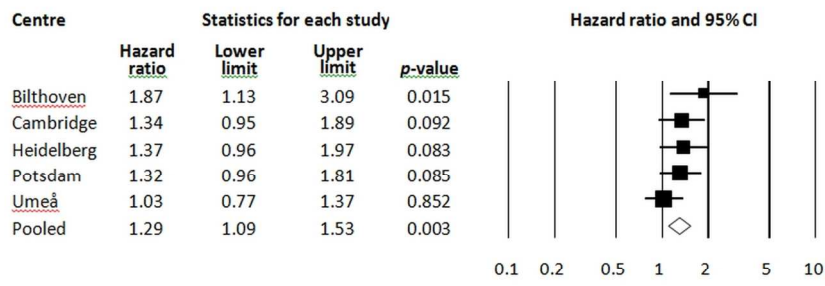

p-value for heterogeneity 0.33, I<sup>2</sup> index 13.3%

**Figure 2** Centre-specific and pooled hazard ratios of incident T2DM adjusted for the variables in the final model (age, sex, education, BMI, smoking, physical activity, alcohol consumption, energy intake and hypertension).

136x90mm (300 x 300 DPI)

Review only

## Appendix

All questionnaires were standardized to fit the question (with four response alternatives):

*How satisfied are you today with your health?*

1 Excellent

2 Good

3 Moderate

4 Poor

Description of the original questions and how they were standardized:

Bilthoven 1993–94

Question: *What do you think about your health in general?*

| Response alternatives          | Standardized  |
|--------------------------------|---------------|
| 1 Excellent                    | 1 Excellent   |
| 2 Good                         | 2 Good        |
| 3 Reasonable                   | 3 Moderate    |
| 4 Mediocre                     | 4 Poor        |
| 5 Poor                         | 4 Poor        |
| 9 More than 1 option indicated | Missing value |

Bilthoven 1995–97

Question: *What do you think about your health in general?*

| Response alternatives          | Standardized  |
|--------------------------------|---------------|
| 1 Excellent                    | 1 Excellent   |
| 2 Very good                    | 2 Good        |
| 3 Good                         | 2 Good        |
| 4 Reasonable                   | 3 Moderate    |
| 5 Mediocre                     | 4 Poor        |
| 9 More than 1 option indicated | Missing value |

Cambridge

Question: *How would you rate your general health?*

| Response alternatives | Standardized |
|-----------------------|--------------|
| 1 Excellent           | 1 Excellent  |
| 2 Good                | 2 Good       |
| 3 Moderate            | 3 Moderate   |
| 4 Poor                | 4 Poor       |

Heidelberg

Question: *On the whole, how satisfied are you today with your health?*



| Response alternatives | Standardized  |
|-----------------------|---------------|
| 1 Very satisfied      | 1 Excellent   |
| 2 More satisfied      | 2 Good        |
| 3 More dissatisfied   | 3 Moderate    |
| 4 Very dissatisfied   | 4 Poor        |
| 8 Do not know         | Missing value |

### Potsdam

Question: *On the whole, how satisfied are you today with your health?*

| Response alternatives      | Standardized  |
|----------------------------|---------------|
| 1 Very satisfied           | 1 Excellent   |
| 2 More likely satisfied    | 2 Good        |
| 3 More likely dissatisfied | 3 Moderate    |
| 4 Very dissatisfied        | 4 Poor        |
| 8 Do not know              | Missing value |

### Umeå

Question: *How do you judge that your state of health has been in the last year?*

| Response alternatives | Standardized  |
|-----------------------|---------------|
| 1 Very well           | 1 Excellent   |
| 2 Quiet well          | 2 Good        |
| 3 Fairly well         | 3 Moderate    |
| 4 Quiet bad           | 4 Poor        |
| 5 Bad                 | 4 Poor        |
| 9 Inconsistent answer | Missing value |
